# Supplementary material for: Reduction of titanocene dichloride with dysprosium: access to a stable titanocene(ii) equivalent for phosphite-free Takeda carbonyl olefination
Source: Royal Society of Chemistry journal article supplement (doi:10.1039/c4dt03979c), 2015-01-01

Supporting Information

## Reduction of titanocene dichloride with dysprosium: access to a stable titanocene(II) equivalent for phosphite-free Takeda carbonyl olefination.

Guillaume Bousrez, Isabelle Déchamps, Jean-Luc Vasse, Florian Jaroschik\*

Institut de Chimie Moléculaire de Reims, ICMR, UMR CNRS 7312, Université de Reims, BP 1039, 51687 Reims, France.

Fax: +33 326913166

Tel: +33 326913244

E-mail: [florian.jaroschik@univ-reims.fr](mailto:florian.jaroschik@univ-reims.fr)

### Content

|                                                                                                                             |     |
|-----------------------------------------------------------------------------------------------------------------------------|-----|
| I. General                                                                                                                  | S2  |
| II. Synthesis and analytical data of compounds <b>3a-g</b>                                                                  | S2  |
| III. Synthesis and analytical data of compounds <b>5a-i</b>                                                                 | S6  |
| IV. Optimisation studies with Dy                                                                                            | S14 |
| V. References                                                                                                               | S14 |
| VI. <sup>1</sup> H, <sup>13</sup> C and <sup>19</sup> F NMR spectra for compounds <b>3b, 3e-g, 5bb, 5bc, 5d, 5e, 5g, 5i</b> | S15 |

## I. General

All reactions were conducted under an atmosphere of argon using standard Schlenk techniques and an argon-filled Jacomex BS531-type dry box. Tetrahydrofuran and diethylether were collected under argon from a PURSOLV MD-3 (Innovative Technologie Inc.) solvent purification unit. Titanocene dichloride was purchased from Strem Chemicals. Aldehydes, ketones and esters were purchased from Aldrich and used as received. Dysprosium ingot was purchased from Aldrich or Strem and, prior to use, freshly filed in a drybox under argon.  $^1\text{H}$ ,  $^{13}\text{C}$  and  $^{19}\text{F}$  NMR spectra were recorded in  $\text{CDCl}_3$ , unless specified, on a 250 MHz Bruker Avance I spectrometer equipped with QNP probe and a 500 MHz Bruker Avance III spectrometer equipped with a BBFO+ probe. Chemical shifts are reported in delta ( $\delta$ ) units, expressed in parts per million (ppm). E/Z isomers of new compounds were determined by NOE experiments. High resolution ESI-MS spectra were recorded on a hybrid tandem quadrupole/time-of-flight (Q-TOF) instrument, equipped with a pneumatically assisted electrospray (Z-spray) ion source (Micromass, Manchester, UK) operated in positive mode. High resolution EI-MS spectra were obtained on a GCT-TOF mass spectrometer (Micromass, Manchester, UK) with EI source. EPR spectra were recorded with a Bruker ESP300e spectrometer (X-band) equipped with a Bruker E035M gaussmeter and an HP 5350B microwave frequency counter. Samples were prepared at a concentration of  $2 \text{ mmol}\cdot\text{L}^{-1}$  in THF frozen solutions (150K, Bruker ER4111VY variable-temperature unit). The best resolution was obtained at  $T = 150 \text{ K}$  by using the modulation amplitude 16.789 G, time constant 81.92 ms, conventional time 20.48 ms and sweep time 20.972 s.

## II. Synthesis and analytical data of compounds 3a-g

### **General procedure for bis(arylsulfanes) 3a-g**

A flask topped with a Dean-Stark apparatus was loaded with aldehyde (20 mmol), *p*-toluene sulfonic acid (0.5 mmol, 95 mg), thiophenol (50 mmol) and toluene (40 mL). The apparatus was set under argon and heated to  $120^\circ\text{C}$  for 15h. The reaction was quenched by addition of a 1N sodium hydroxide solution (15 mL). The aqueous layer was extracted with  $\text{Et}_2\text{O}$  (3 x 25 mL), the organic phases were combined, washed with brine, dried over  $\text{MgSO}_4$ , and concentrated under vacuum. The dithioacetal was obtained without further purification.

### **(phenylmethylene)bis(phenylsulfane) (3a)<sup>1</sup>**

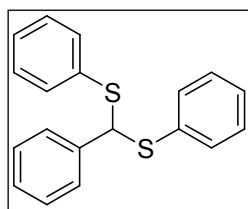

White solid, quantitative yield

$^1\text{H}$  (600 MHz,  $\text{CDCl}_3$ )

5.42 (s, 1H), 7.20-7.22 (m, 8H), 7.23-7.26 (m, 2H), 7.33-7.36 (m, 5H).

<sup>13</sup>C (150 MHz, CDCl<sub>3</sub>)

60.5 (CH), 127.9 (CH), 128.0 (CH), 128.1 (CH), 128.6 (CH), 128.9 (CH), 132.6 (CH), 134.6 (C), 139.7 (C).

HRMS (EI) for C<sub>19</sub>H<sub>16</sub>S<sub>2</sub> : calc. (m/z) 308.0693 ; found (m/z) 308.0702.

**((4-fluorophenyl)methylene)bis(phenylsulfane) (3b)**

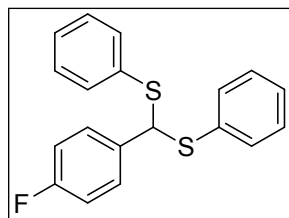

White solid, quantitative yield

<sup>1</sup>H (500 MHz, CDCl<sub>3</sub>)

5.39 (s, 1H), 6.90 (dd, J<sub>H-H</sub> = 9.0 Hz, J<sub>H-H</sub> = 9.0 Hz, 2H), 7.20-7.21 (m, 6H), 7.27-7.32 (m, 6H).

<sup>13</sup>C (125 MHz, CDCl<sub>3</sub>)

59.7 (CH), 115.4 (d, J<sub>F-C</sub> = 21.6 Hz, CH), 128.1 (CH), 129.0 (CH), 129.7 (d, J<sub>F-C</sub> = 8.3 Hz, CH), 132.8 (CH), 134.3 (C), 135.6 (d, J<sub>F-C</sub> = 3.1 Hz, C), 162.3 (d, J<sub>F-C</sub> = 245.8 Hz, C).

<sup>19</sup>F (470 MHz, CDCl<sub>3</sub>)

-113.6

HRMS (EI) for C<sub>19</sub>H<sub>15</sub>FS<sub>2</sub> : calc. (m/z) 326.0599 ; found (m/z) 326.0597.

**((4-methoxyphenyl)methylene)bis(phenylsulfane) (3c)<sup>2</sup>**

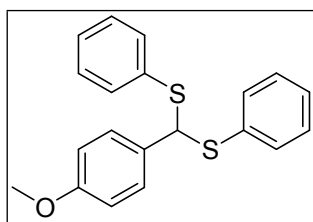

White solid, quantitative yield

<sup>1</sup>H (500 MHz, CDCl<sub>3</sub>)

3.82 (s, 3H), 5.50 (s, 1H), 6.85 (d, J<sub>H-H</sub> = 7.0 Hz, 2H), 7.29-7.30 (m, 6H), 7.37 (d, J<sub>H-H</sub> = 7.0 Hz, 2H), 7.40-7.41 (m, 4H).

<sup>13</sup>C (125 MHz, CDCl<sub>3</sub>)

55.3 (CH<sub>3</sub>), 59.8 (CH), 113.9 (CH), 127.8 (CH), 128.9 (CH), 129.2 (CH), 131.7 (C), 132.4 (CH), 134.8 (C), 159.4 (C).

Elemental Analysis for C<sub>20</sub>H<sub>18</sub>OS<sub>2</sub> calc. C : 70.97, H : 5.96, S : 18.95 ; found C : 71.04, H : 5.44, S : 18.73.

### **2-(2-methylprop-1-enyl)-1,3-dithiane (3d)**<sup>3,4</sup>

A flask was loaded with aldehyde (5 mmol), 1,3-propanedithiol (5.5 mmol), iodine (0.5 mmol) and chloroform (20 mL). The solution was stirred for 30 minutes then the reaction was quenched with an addition of 1N sodium hydroxide solution (10 mL). The organic phase was separated and the aqueous layer was extracted with dichloromethane (3 x 25 mL). The organic phases were combined, washed with brine, dried over MgSO<sub>4</sub>, and concentrated under vacuum. The dithiane was obtained without further purification.

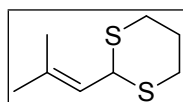

Yellow oil, quantitative yield

<sup>1</sup>H (500 MHz, CDCl<sub>3</sub>)

1.74 (s, 6H), 1.78-1.86 (m, 1H), 2.06-2.10 (m, 1H), 2.77-2.81 (m, 2H), 2.94 (dd, J<sub>H-H</sub> = 13.0 Hz, J<sub>H-H</sub> = 13.0 Hz, 2H), 4.86 (d, J<sub>H-H</sub> = 10.0 Hz, 1H), 5.13 (d, J<sub>H-H</sub> = 10.0 Hz, 1H).

<sup>13</sup>C (125 MHz, CDCl<sub>3</sub>)

18.5 (CH<sub>3</sub>), 25.1 (CH<sub>2</sub>), 25.7 (CH<sub>3</sub>), 30.7 (CH<sub>2</sub>), 44.5 (CH), 121.3 (CH), 137.9 (C).

HRMS (EI) for C<sub>8</sub>H<sub>14</sub>S<sub>2</sub> : calc. (m/z) 174.0537 ; found (m/z) 174.0540.

### **decan-1,1-diylbis(phenylsulfane) (3e)**

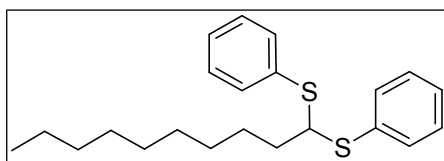

Yellow oil, quantitative yield

<sup>1</sup>H (500 MHz, CDCl<sub>3</sub>)

0.90 (t, J<sub>H-H</sub> = 7.0 Hz, J<sub>H-H</sub> = 7.0 Hz, 3H), 1.26-1.31 (m, 2H), 1.59-1.62 (m, 2H), 1.85 (q, J<sub>H-H</sub> = 15.0 Hz, J<sub>H-H</sub> = 7.0 Hz, 2H), 4.41 (t, J<sub>H-H</sub> = 6.5 Hz, J<sub>H-H</sub> = 6.5 Hz, 1H), 7.28-7.33 (m, 6H), 7.46-7.75 (m, 4H).

<sup>13</sup>C (125 MHz, CDCl<sub>3</sub>)

14.3 (CH<sub>3</sub>), 22.8 (CH<sub>2</sub>), 27.2 (CH<sub>2</sub>), 29.2 (CH<sub>2</sub>), 29.4 (CH<sub>2</sub>), 29.5 (CH<sub>2</sub>), 29.6 (CH<sub>2</sub>), 30.0 (CH<sub>2</sub>), 36.0 (CH<sub>2</sub>), 58.6 (CH), 127.7 (CH), 129.0 (CH), 132.8 (CH), 134.6 (C).

HRMS (EI) for C<sub>22</sub>H<sub>30</sub>S<sub>2</sub> : calc. (m/z) 358.1789 ; found (m/z) 358.1797.

**decan-1,1-diylbis((4-fluorophenyl)sulfane) (3f)**

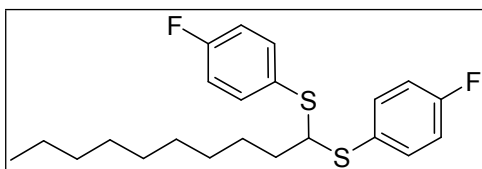

Yellow oil, quantitative yield

<sup>1</sup>H (500 MHz, CDCl<sub>3</sub>)

0.88 (t, J<sub>H-H</sub> = 7.0 Hz, J<sub>H-H</sub> = 7.0 Hz, 3H), 1.24 (s, 10H), 1.28-1.31 (m, 2H), 1.54-1.58 (m, 2H), 1.76 (dd, J<sub>H-H</sub> = 15.0 Hz, J<sub>H-H</sub> = 7.0 Hz, 2H), 4.19 (t, J<sub>H-H</sub> = 7.0 Hz, J<sub>H-H</sub> = 7.0 Hz, 1H), 7.01 (dd, J<sub>H-H</sub> = 8.5 Hz, J<sub>F-H</sub> = 8.5 Hz, 4H), 7.43 (dd, J<sub>H-H</sub> = 8.5 Hz, J<sub>F-H</sub> = 5.0 Hz, 4H).

<sup>13</sup>C (125 MHz, CDCl<sub>3</sub>)

14.3 (CH<sub>3</sub>), 22.8 (CH<sub>2</sub>), 27.2 (CH<sub>2</sub>), 29.1 (CH<sub>2</sub>), 29.4 (CH<sub>2</sub>), 29.5 (CH<sub>2</sub>), 29.6 (CH<sub>2</sub>), 32.0 (CH<sub>2</sub>), 35.7 (CH<sub>2</sub>), 60.5 (CH), 116.1 (d, J<sub>F-C</sub> = 21.8 Hz, CH), 129.2 (d, J<sub>F-C</sub> = 3.3 Hz, C), 135.9 (d, J<sub>F-C</sub> = 8.3 Hz, CH), 162.9 (d, J<sub>F-C</sub> = 246.9 Hz, C).

<sup>19</sup>F (235 MHz, CDCl<sub>3</sub>)

-113.5

HRMS (EI) for C<sub>22</sub>H<sub>28</sub>F<sub>2</sub>S<sub>2</sub> : calc. (m/z) 394.1600 ; found (m/z) 394.1577.

**(phenylmethylene)bis((4-fluorophenyl)sulfane) (3g)**

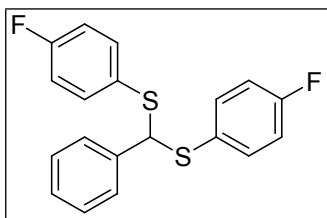

White solide, quantitative yield

<sup>1</sup>H (500 MHz, CDCl<sub>3</sub>)

5.23 (s, 1H), 6.92 (dd, J<sub>H-H</sub> = 9.0 Hz, J<sub>F-H</sub> = 9.0 Hz, 4H), 7.24-7.26 (m, 5H), 7.30 (dd, J<sub>H-H</sub> = 9.0 Hz, J<sub>F-H</sub> = 5.5 Hz, 4H).

<sup>13</sup>C (125 MHz, CDCl<sub>3</sub>)

62.2 (CH), 116.1 (d,  $J_{F-C} = 21.8$  Hz, CH), 127.9 (CH), 128.3 (CH), 128.6 (CH), 129.2 (d,  $J_{F-C} = 3.4$  Hz, C), 135.9 (d,  $J_{F-C} = 8.4$  Hz, CH), 139.4 (C), 163.0 (d,  $J_{F-C} = 247.4$  Hz, C).

<sup>19</sup>F (470 MHz, CDCl<sub>3</sub>)

-112.6

HRMS (EI) for C<sub>19</sub>H<sub>14</sub>F<sub>2</sub>S<sub>2</sub> : calc. (m/z) 344.0505 ; found (m/z) 344.0517.

### III. Synthesis and analytical data of compounds 5a-i.

#### General procedure for the preparation of alkenes (5a-i).

A Schlenk tube was loaded with dichlorotitanocene (Cp<sub>2</sub>TiCl<sub>2</sub>) (370 mg, 1.5 mmol), dysprosium (244 mg, 1.5 mmol) and THF (5 mL) under an atmosphere of argon. The resulting mixture was stirred vigorously at room temperature until a deep green color appeared. After three hours, the dithioacetal (0.6 mmol) solubilized in THF (2 mL) was added to the reaction mixture. Twenty minutes later, the carbonyl compound (0.5 mmol) solubilized in THF (3 mL) was added dropwise. The solution was heated to 50°C for 90 minutes and the reaction was followed by TLC. At the end of the reaction petroleum ether was added to the cooled solution and the reaction mixture was filtered over celite (petroleum ether / ethyl acetate (80/20)). The solvent was concentrated under vacuum and the residue was purified by flash column chromatography (silica gel, petroleum ether) to give the corresponding alkene.

#### Procedure "All-in-one".

A Schlenk tube was loaded with dichlorotitanocene (Cp<sub>2</sub>TiCl<sub>2</sub>) (370 mg, 1.5 mmol), dysprosium (244 mg, 1.5 mmol), dithioacetal (0.6 mmol), carbonyl compound (0.5 mmol) and THF (10 mL) under an atmosphere of argon. The resulting mixture was stirred vigorously at room temperature until a deep green color appeared, which rapidly changed to purple. After four hours, petroleum ether was added to the solution and the reaction mixture was filtered over celite (petroleum ether / ethyl acetate (80/20)). The solvent was concentrated under vacuum and the residue was purified by flash column chromatography (silica gel, petroleum ether) to give the corresponding alkene.

#### 1-methoxy-1,2-diphenylethene (5a)<sup>5</sup>

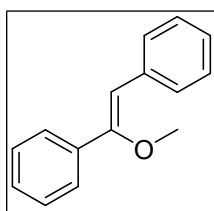

Colourless oil, 65% (Z / E : >95/5)

**(Z)-isomer:**

<sup>1</sup>H (250 MHz, CDCl<sub>3</sub>)

3.55 (s, 3H), 6.02 (s, 1H), 7.13-7.16 (m, 1H), 7.24-7.32 (m, 5H), 7.48 (dd,  $J_{H-H} = 8.0$  Hz,  $J_{H-H} = 1.5$  Hz, 2H), 7.63 (d,  $J_{H-H} = 7.3$  Hz, 2H).

**1-((4-tert-butylcyclohexylidene)methyl)benzene (5ba)<sup>6</sup>**

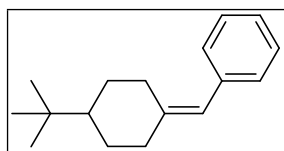

Colourless oil, 57 %

<sup>1</sup>H (250 MHz, CDCl<sub>3</sub>)

0.86 (s, 9H), 1.02-1.25 (m, 3H), 1.81-1.95 (m, 3H), 2.20 (dd,  $J_{H-H} = 13.0$  Hz,  $J_{H-H} = 13.0$  Hz, 1H), 2.39 (dd,  $J_{H-H} = 13.3$  Hz,  $J_{H-H} = 2.3$  Hz, 1H), 2.97 (dd,  $J_{H-H} = 12.8$  Hz,  $J_{H-H} = 2.0$  Hz, 1H), 6.22 (s, 1H), 7.17-7.23 (m, 3H), 7.27-7.33 (m, 2H).

<sup>13</sup>C (62.5 MHz, CDCl<sub>3</sub>)

27.8 (CH<sub>3</sub>), 28.7 (CH<sub>2</sub>), 29.4 (CH<sub>2</sub>), 29.4 (CH<sub>2</sub>), 32.6 (C), 37.7 (CH<sub>2</sub>), 48.4 (CH), 121.7 (CH), 125.9 (CH), 128.1 (CH), 129.1 (CH), 138.5 (C), 143.5 (C).

HRMS (EI) for C<sub>17</sub>H<sub>24</sub> : calc. (m/z) 228.1878 ; found (m/z) 228.1887.

**1-((4-tert-butylcyclohexylidene)methyl)-4-fluorobenzene (5bb)**

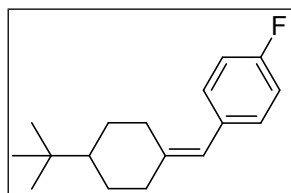

Colourless oil, 57%

<sup>1</sup>H (500 MHz, CDCl<sub>3</sub>)

0.88 (s, 9H), 1.01-1.09 (m, 1H), 1.13-1.21 (m, 1H), 1.22-1.28 (m, 1H), 1.83-1.89 (m, 2H), 1.92-1.97 (m, 1H), 2.17-2.23 (m, 1H), 2.37-2.42 (m, 1H), 2.88-2.92 (m, 1H), 6.18 (s, 1H), 7.00 (dd,  $J_{F-H} = 9.0$  Hz,  $J_{H-H} = 8.5$  Hz, 2H), 7.16 (dd,  $J_{H-H} = 8.5$  Hz,  $J_{F-H} = 5.5$  Hz, 2H).

<sup>13</sup>C (125 MHz, CDCl<sub>3</sub>)

27.8 (CH<sub>3</sub>), 28.6 (CH<sub>2</sub>), 29.3 (CH<sub>2</sub>), 32.6 (C), 37.6 (CH<sub>2</sub>), 48.4 (CH<sub>2</sub>), 114.9 (d,  $J_{F-C} = 21.0$  Hz, CH), 120.7 (CH), 130.5 (d,  $J_{F-C} = 7.6$  Hz, CH), 134.5 (d,  $J_{F-C} = 3.3$  Hz, C), 143.5 (C), 161.2 (d,  $J_{F-C} = 243.1$  Hz, C).

$^{19}\text{F}$  (470 MHz,  $\text{CDCl}_3$ )

-116.9

HRMS (EI) for  $\text{C}_{17}\text{H}_{23}\text{F}$  : calc. (m/z) 246.1784 ; found (m/z) 246.1784.

**1-((4-tert-butylcyclohexylidene)methyl)-4-methoxybenzene (5bc)**

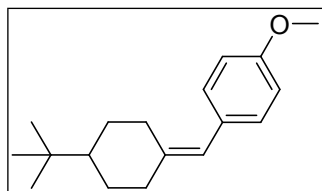

Colourless oil, 54%

$^1\text{H}$  (500 MHz,  $\text{CDCl}_3$ )

0.87 (s, 9H), 1.03-1.09 (m, 1H), 1.12-1.20 (m, 1H), 1.21-1.27 (m, 1H), 1.83-1.89 (m, 2H), 1.91-1.94 (m, 1H), 2.16-2.22 (m, 1H), 2.36-2.97 (m, 1H), 2.94-2.97 (m, 1H), 3.81 (s, 3H), 6.17 (s, 1H), 6.86 (d,  $J_{\text{H-H}} = 9.0$  Hz, 2H), 7.15 (d,  $J_{\text{H-H}} = 9.0$  Hz, 2H).

$^{13}\text{C}$  (125 MHz,  $\text{CDCl}_3$ )

27.8 ( $\text{CH}_3$ ), 28.6 ( $\text{CH}_2$ ), 29.357 ( $\text{CH}_2$ ), 29.375 ( $\text{CH}_2$ ), 32.6 (C), 37.7 ( $\text{CH}_2$ ), 48.4 (CH), 55.4 ( $\text{CH}_3$ ), 113.6 (CH), 121.2 (CH), 130.1 (CH), 131.1 (C), 142.3 (C), 157.8 (C).

HRMS (EI) for  $\text{C}_{18}\text{H}_{26}\text{O}$  : calc. (m/z) 258.1984 ; found (m/z) 258.1988.

**1,1,2-triphenylethene (5ca)**<sup>7</sup>

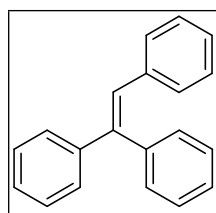

Colourless oil, 64%

$^1\text{H}$  (250 MHz,  $\text{CDCl}_3$ )

6.96 (s, 1H), 7.00-7.04 (m, 2H), 7.09-7.13 (m, 3H), 7.18-7.22 (m, 2H), 7.28-7.33 (m, 8H).

$^{13}\text{C}$  (62.5 MHz,  $\text{CDCl}_3$ )

126.9 (CH), 127.5 (CH), 127.6 (CH), 127.7 (CH), 128.1 (CH), 128.3 (CH), 128.3 (CH), 128.8 (CH), 129.7 (CH), 130.5 (CH), 137.5 (C), 140.5 (C), 142.7 (C), 143.6 (C).

HRMS (EI) for  $\text{C}_{20}\text{H}_{16}$  : calc. (m/z) 256.1252 ; found (m/z) 256.1256.



**1-(2-(4-fluorophenyl)-1-phenylvinyl)benzene (5cb)<sup>8</sup>**

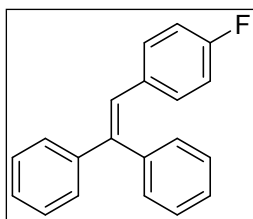

Colourless oil, 62%

<sup>1</sup>H (500 MHz, CDCl<sub>3</sub>)

6.84 (dd,  $J_{\text{H-H}} = 9.0$  Hz,  $J_{\text{F-H}} = 8.5$  Hz, 2H), 6.95 (s, 1H), 7.01 (dd,  $J_{\text{H-H}} = 8.5$  Hz,  $J_{\text{F-H}} = 5.5$  Hz, 2H), 7.21-7.23 (m, 2H), 7.31-7.37 (m, 8H).

<sup>13</sup>C (125 MHz, CDCl<sub>3</sub>)

115.0 (d,  $J_{\text{F-C}} = 21.3$  Hz, CH), 127.0 (CH), 127.7 (dd,  $J_{\text{F-C}} = 3.4$  Hz,  $J_{\text{F-C}} = 3.3$  Hz, CH), 128.4 (CH), 128.9 (CH), 130.5 (CH), 131.2 (d,  $J_{\text{F-C}} = 7.8$  Hz, CH), 133.6 (d,  $J_{\text{F-C}} = 3.3$  Hz, C), 140.3 (C), 142.6 (d,  $J_{\text{F-C}} = 1.6$  Hz, C), 143.4 (C), 161.6 (d,  $J_{\text{F-C}} = 245.6$  Hz, C).

<sup>19</sup>F (470 MHz, CDCl<sub>3</sub>)

-114.7

HRMS (EI) for C<sub>20</sub>H<sub>15</sub>F : calc. (m/z) 274.1158 ; found (m/z) 274.1158.

**1-(2-(4-methoxyphenyl)-1-phenylvinyl)benzene (5cc)<sup>9</sup>**

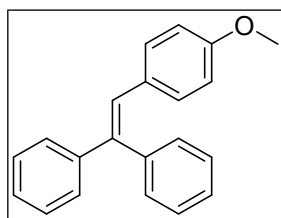

Colourless oil, 60%

<sup>1</sup>H (500 MHz, CDCl<sub>3</sub>)

3.80 (s, 3H), 6.73 (d,  $J_{\text{H-H}} = 3.8$  Hz, 2H), 6.98 (s, 1H), 7.02 (d,  $J_{\text{H-H}} = 3.5$  Hz, 2H), 7.28-7.30 (m, 2H), 7.31-7.35 (m, 2H), 7.36-7.36 (m, 1H), 7.37-7.37 (m, 2H), 7.38-7.40 (m, 2H), 7.40-7.42 (m, 1H).

<sup>13</sup>C (125 MHz, CDCl<sub>3</sub>)

55.3 (CH<sub>3</sub>), 113.5 (CH), 127.3 (CH), 127.4 (CH), 127.5 (CH), 127.8 (CH), 128.3 (CH), 128.8 (CH), 130.2 (C), 130.5 (CH), 130.9 (CH), 140.7 (C), 140.8 (C), 143.7 (C), 158.5 (C).

HRMS (EI) for C<sub>20</sub>H<sub>15</sub>F : calc. (m/z) 286.1358 ; found (m/z) 286.1361.

**1-fluoro-4-(2-methyl-4-phenylbut-1-enyl)benzene (5d)**

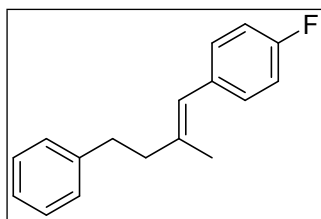

Colourless oil, 53% (Z/E : 1 / 1)

**(E)-isomer**

<sup>1</sup>H (500 MHz, CDCl<sub>3</sub>)

1.88 (s, 3H), 2.47 (dd,  $J_{H-H} = 8.0$  Hz,  $J_{H-H} = 8.0$  Hz, 2H), 2.84 (dd,  $J_{H-H} = 8.5$  Hz,  $J_{H-H} = 7.5$  Hz, 2H), 6.21 (s, 1H), 7.00 (dd,  $J_{H-H} = 9.0$  Hz,  $J_{H-H} = 8.5$  Hz, 2H), 7.16 (dd,  $J_{H-H} = 8.5$  Hz,  $J_{H-H} = 5.5$  Hz, 2H), 7.21-7.23 (m, 3H), 7.31 (dd,  $J_{H-H} = 8.0$  Hz,  $J_{H-H} = 7.0$  Hz, 2H).

<sup>13</sup>C (125 MHz, CDCl<sub>3</sub>)

18.0 (CH<sub>3</sub>), 34.8 (CH<sub>2</sub>), 42.6 (CH<sub>2</sub>), 115.0 (d,  $J_{F-C} = 21.1$  Hz, CH), 124.5 (CH), 126.0 (CH), 128.5 (d,  $J_{F-C} = 12.8$  Hz, CH), 130.4 (d,  $J_{F-C} = 7.6$  Hz, CH), 134.6 (d,  $J_{F-C} = 3.3$  Hz, C), 138.3 (C), 142.1 (C), 161.3 (d,  $J_{F-C} = 243.5$  Hz, C).

<sup>19</sup>F (470 MHz, CDCl<sub>3</sub>)

-116.7

HRMS (EI) for C<sub>17</sub>H<sub>17</sub>F : calc. (m/z) 240.1314 ; found (m/z) 240.1320.

**(Z)-isomer**

<sup>1</sup>H (250 MHz, CDCl<sub>3</sub>)

1.86 (s, 3H), 2.38-2.44 (m, 2H), 2.67-2.76 (m, 2H), 6.19 (s, 1H), 6.97 (dd,  $J_{H-H} = 8.8$  Hz,  $J_{H-H} = 8.8$  Hz, 2H), 7.13-7.22 (m, 7H).

<sup>19</sup>F (235 MHz, CDCl<sub>3</sub>)

-117.1

**(Z)-2-benzylidene-tetrahydro-3,3-diphenylfuran (5e)**

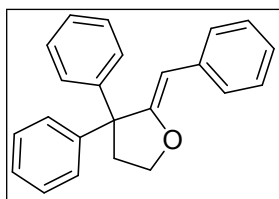

White solid, 57% (Z / E : 1 / 0)

<sup>1</sup>H (500 MHz, CDCl<sub>3</sub>)

2.92 (t,  $J_{H-H} = 6.5$  Hz,  $J_{H-H} = 6.5$  Hz, 2H), 4.29 (t,  $J_{H-H} = 6.5$  Hz,  $J_{H-H} = 6.5$  Hz, 2H), 5.02 (s, 1H), 7.35-7.38 (m, 5H), 7.41 (s, 5H), 7.42 (s, 3H), 7.66-7.68 (m, 2H).

<sup>13</sup>C (125 MHz, CDCl<sub>3</sub>)

40.4 (CH<sub>2</sub>), 60.7 (C), 68.7 (CH<sub>2</sub>), 102.4 (CH), 125.3 (CH), 127.0 (CH), 127.7 (CH), 128.3 (CH), 128.3 (CH), 128.9 (CH), 136.6 (C), 143.7 (C (x2)), 162.3 (C).

HRMS (EI) for C<sub>23</sub>H<sub>20</sub>O : calc. (m/z) 312.1514 ; found (m/z) 312.1523.

**1-[4-N,N-(dimethylamino)phenyl]-2-phenylethene (5f)<sup>10</sup>**

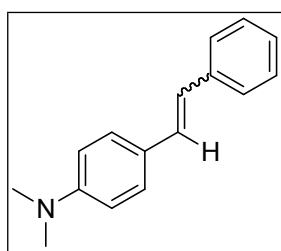

White solid, 45% (Z / E : 1 / 4.5)

**(E)-isomer**

<sup>1</sup>H (250 MHz, CDCl<sub>3</sub>)

2.99 (s, 6H), 6.75 (d,  $J_{H-H} = 8.8$  Hz, 2H), 6.92 (m, 1H), 7.05 (m, 1H), 7.20 (m, 1H), 7.33 (m, 2H), 7.42 (m, 2H), 7.48 (m, 2H).

**(Z)-isomer**

<sup>1</sup>H (250 MHz, CDCl<sub>3</sub>)

2.92 (s, 6H), 6.40 (m, 1H), 6.48 (m, 1H), 6.55-6.57 (m, 2H), 7.14-7.18 (m, 3H), 7.22-7.25 (m, 2H), 7.31-7.33 (m, 2H).

### Methyl 4-methyl-5-phenylpent-4-enoate (5g)

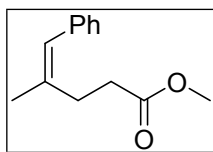

White solid, 56% (Z / E : 3 / 2)

#### (Z)-isomer

<sup>1</sup>H (500 MHz, CDCl<sub>3</sub>)

1.87 (d,  $J_{H-H} = 0.5$  Hz, 3H), 2.50-2.52 (m, 2H), 2.54-2.56 (m, 2H), 3.70 (s, 3H), 6.30 (s, 1H), 7.22 (d,  $J_{H-H} = 7.5$  Hz, 3H), 7.30-7.33 (m, 2H).

<sup>13</sup>C (125 MHz, CDCl<sub>3</sub>)

17.8 (CH<sub>3</sub>), 33.1 (CH<sub>2</sub>), 35.7 (CH<sub>2</sub>), 51.7 (CH<sub>3</sub>), 125.8 (CH), 128.3 (CH), 128.7 (CH), 129.0 (CH), 137.2 (C), 138.3 (C), 173.8 (C).

HRMS (EI) for C<sub>13</sub>H<sub>16</sub>O<sub>2</sub> : calc. (m/z) 204.1150 ; found (m/z) 204.1152.

#### (E)-isomer

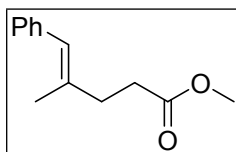

<sup>1</sup>H (500 MHz, CDCl<sub>3</sub>)

1.89 (d,  $J_{H-H} = 1.0$  Hz, 3H), 2.46-2.50 (m, 2H), 2.57-2.60 (m, 2H), 3.65 (s, 3H), 6.34 (s, 1H), 7.19 (d,  $J_{H-H} = 7.5$  Hz, 3H), 7.30-7.33 (m, 2H).

<sup>13</sup>C (125 MHz, CDCl<sub>3</sub>)

23.7 (CH<sub>3</sub>), 28.0 (CH<sub>2</sub>), 32.8 (CH<sub>2</sub>), 51.7 (CH<sub>3</sub>), 126.3 (CH), 127.2 (CH), 128.3 (CH), 137.0 (C), 138.1 (C), 173.8 (C).

HRMS (EI) for C<sub>13</sub>H<sub>16</sub>O<sub>2</sub> : calc. (m/z) 204.1150 ; found (m/z) 204.1152.

### 1-(1-methoxy-4-methylpenta-1,3-dienyl)benzene (5h)<sup>11</sup>

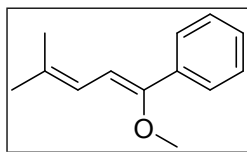

Colourless oil, 68% (Z / E : 4 / 1)

**(Z)-isomer**

<sup>1</sup>H (250 MHz, CDCl<sub>3</sub>)

1.81 (s, 3H), 1.87 (s, 3H), 3.60 (s, 3H), 6.16 (d,  $J_{H-H} = 11.3$  Hz, 1H), 6.29-6.37 (m, 1H), 7.22-7.57 (m, 5H).

**(E)-isomer**

<sup>1</sup>H (250 MHz, CDCl<sub>3</sub>)

1.72 (s, 3H), 1.78 (s, 3H), 3.72 (s, 3H), 5.67 (d,  $J_{H-H} = 11.0$  Hz, 1H), 5.85-5.92 (m, 1H), 7.22-7.57 (m, 5H).

**1-(1-methoxyundec-1-enyl)benzene (5i)**

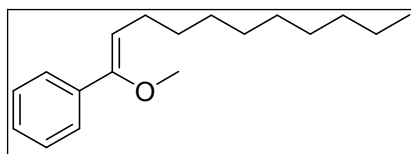

Colourless oil, 31% (Z / E : 7 / 1)

**(Z)-isomer**

<sup>1</sup>H (500 MHz, C<sub>6</sub>D<sub>6</sub>)

0.91 (t,  $J_{H-H} = 7.0$  Hz,  $J_{H-H} = 7.0$  Hz, 3H), 1.28-1.30 (m, 10H), 1.35-1.41 (m, 2H), 1.43-1.49 (m, 2H), 2.39 (q,  $J_{H-H} = 15.0$  Hz,  $J_{H-H} = 7.5$  Hz, 2H), 3.34 (s, 1H), 5.32 (t,  $J_{H-H} = 7.5$  Hz,  $J_{H-H} = 7.5$  Hz, 1H), 7.15-7.18 (m, 3H), 7.47-7.49 (m, 2H).

<sup>13</sup>C (125 MHz, C<sub>6</sub>D<sub>6</sub>)

14.4 (CH<sub>3</sub>), 23.1 (CH<sub>2</sub>), 26.1 (CH<sub>2</sub>), 29.8 (CH<sub>2</sub>), 29.9 (CH<sub>2</sub>), 30.1 (CH<sub>2</sub>), 30.1 (CH<sub>2</sub>), 30.4 (CH<sub>2</sub>), 35.4 (CH<sub>2</sub>), 58.2 (CH<sub>3</sub>), 114.9 (CH), 126.4 (CH), 127.9 (CH), 128.7 (CH), 136.8 (C), 155.6 (C).

HRMS (EI) for C<sub>18</sub>H<sub>28</sub>O : calc. (m/z) 260.2140 ; found (m/z) 260.2134.

**IV. Optimisation studies with Dy**

A Schlenk tube was loaded with dichlorotitanocene ( $\text{Cp}_2\text{TiCl}_2$ ) (370 mg, 1.5 mmol), dysprosium (1.2 or 1.5 mmol) and THF (5 mL) under an atmosphere of argon. The resulting mixture was stirred vigorously at room temperature until a deep green color appeared. After three hours, the agitation was stopped and the solution was diluted with THF to a concentration of 2 mmol/L. An EPR tube was loaded under argon with 0.5 mL of the solution and measured at 150K.

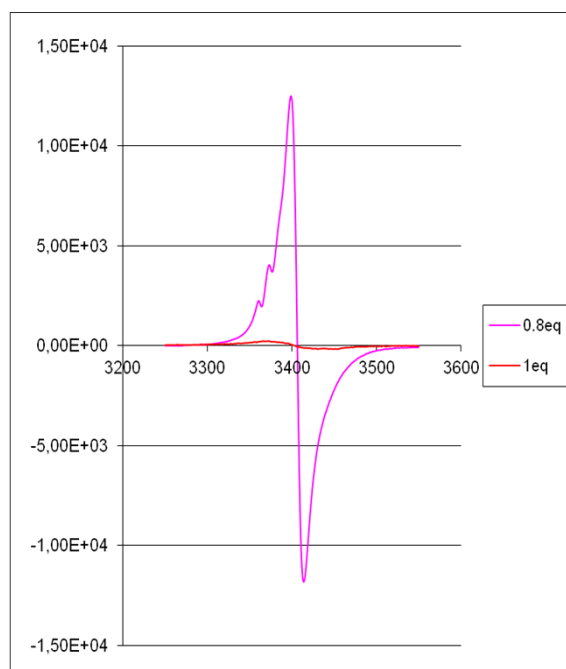

Comparison of EPR spectra with 1.2 mmol Dy (0.8 equiv., pink line) and 1.5 mmol Dy (1.0 equiv., red line): The concentration of Ti(III) present in solution is 50 times less with 1.0 equiv. Dy compared to 0.8 equiv. Dy.

## V. References

- 1 Y.-C. Wu, J. Zhu, *J. Org. Chem.*, 2008, **73**, 9522.
- 2 V. G. Saraswathy, S. Sankararaman, *J. Org. Chem.*, 1994, **59**, 4665.
- 3 A. B. V. K. Kumar, K. S. V. K. Rao, M. Maheswara, M. C. S. Subha, S. Cui, D. In, Y.-I. Lee, *Bull. Korean Chem. Soc.*, 2008, **29**, 2291.
- 4 B. H. Lipshutz, C.-T. Lee, J. M. Servesko, *Org. Lett.*, 2007, **9**, 4713.
- 5 S. Samajdar, M. K. Basu, F. F. Becker, B. K. Banik, *Tetrahedron Lett.*, 2001, **2**, 4425.
- 6 R. C. Jones, M. Galezowski, D. F. O'Shea, *J. Org. Chem.*, 2013, **78**, 8044.
- 7 G. Pelletier, S. Lie, J. J. Mousseau, A. B. Charrette, *Org. Lett.*, 2012, **14**, 464.
- 8 T. Shimasaki, Y. Konno, M. Tobisu, N. Chatani, *Org. Lett.*, 2009, **11**, 4890.
- 9 E. S. Krijnen, H. Zuilhof, G. Lodder, *J. Org. Chem.*, 1994, **59**, 8139.
- 10 R. P. Polniaszek, A. L. Foster, *J. Org. Chem.*, 1991, **56**, 3137.
- 11 Y. Horikawa, M. Watanabe, T. Fujiwara and T. Takeda, *J. Am. Chem. Soc.*, 1997, **119**, 1127.

VI.  $^1\text{H}$ ,  $^{13}\text{C}$  and  $^{19}\text{F}$  NMR spectra for compounds **3b**, **3e-g**, **5bb**, **5bc**, **5d**, **5e**, **5g**, **5i**.

**3b**

$^1\text{H}$  (500 MHz,  $\text{CDCl}_3$ , r.t.)

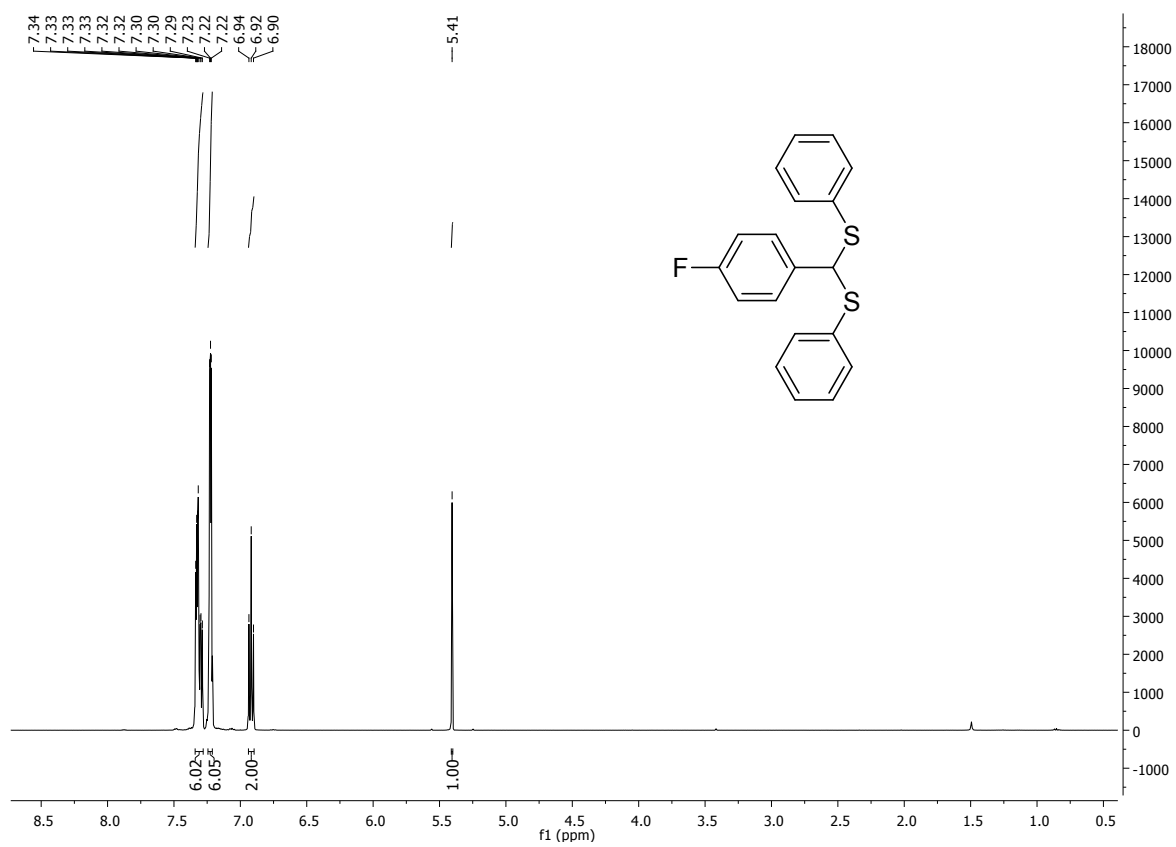

$^{13}\text{C}$  (125 MHz,  $\text{CDCl}_3$ , r.t.)

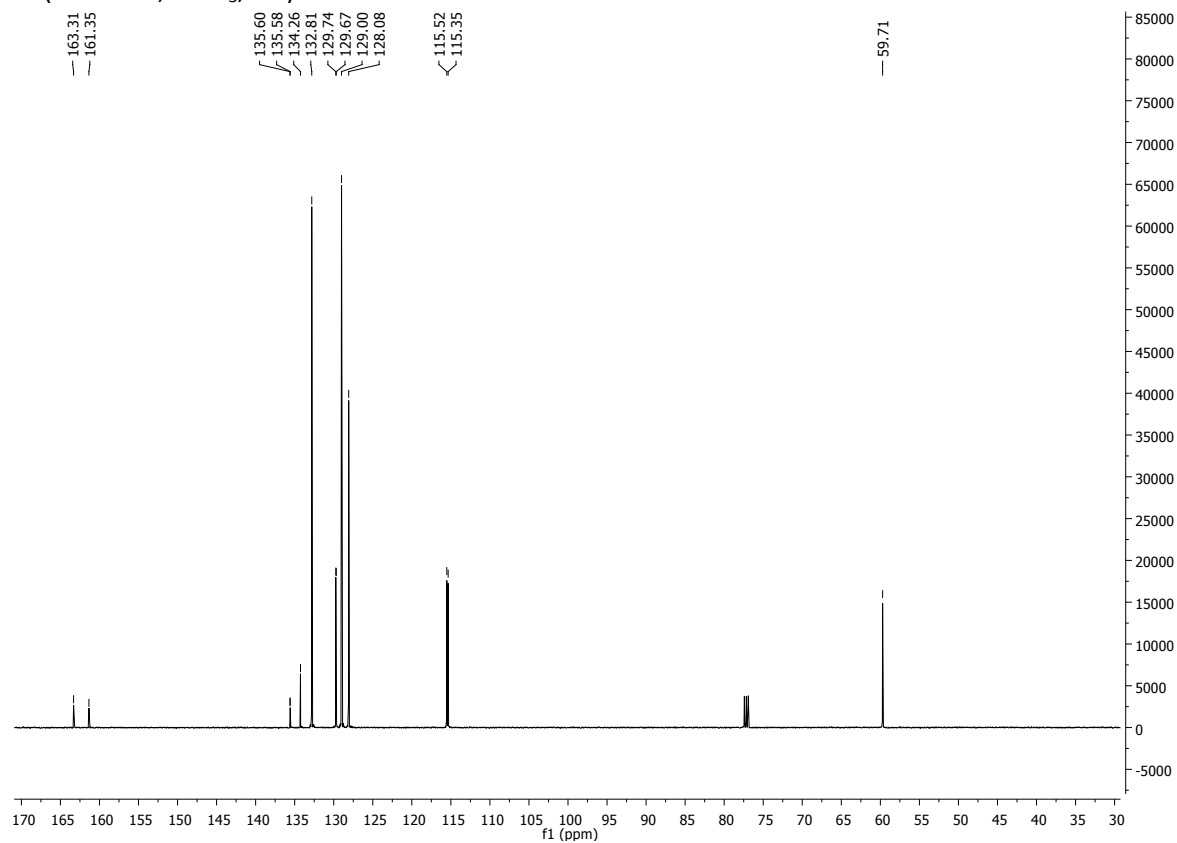

$^{19}\text{F}$  (470 MHz,  $\text{CDCl}_3$ , r.t.)

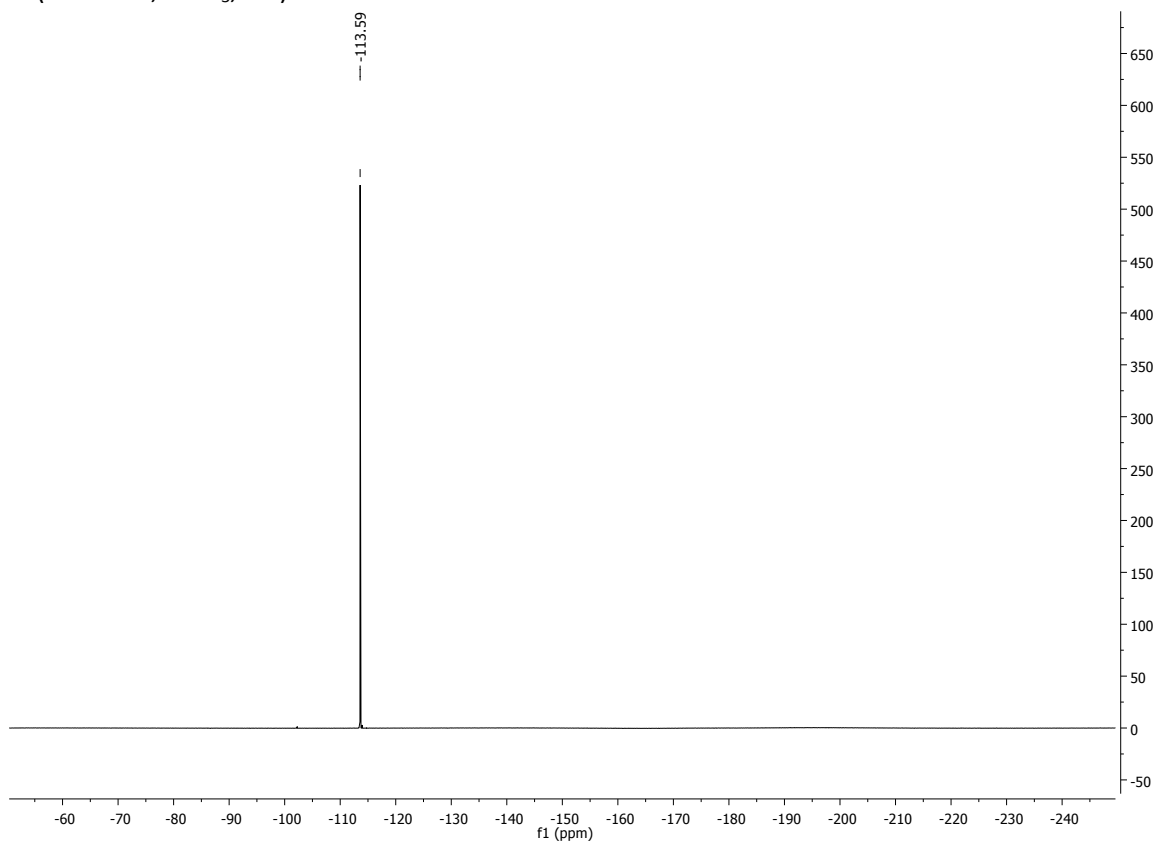



3e

$^1\text{H}$  (500 MHz,  $\text{CDCl}_3$ , r.t.)

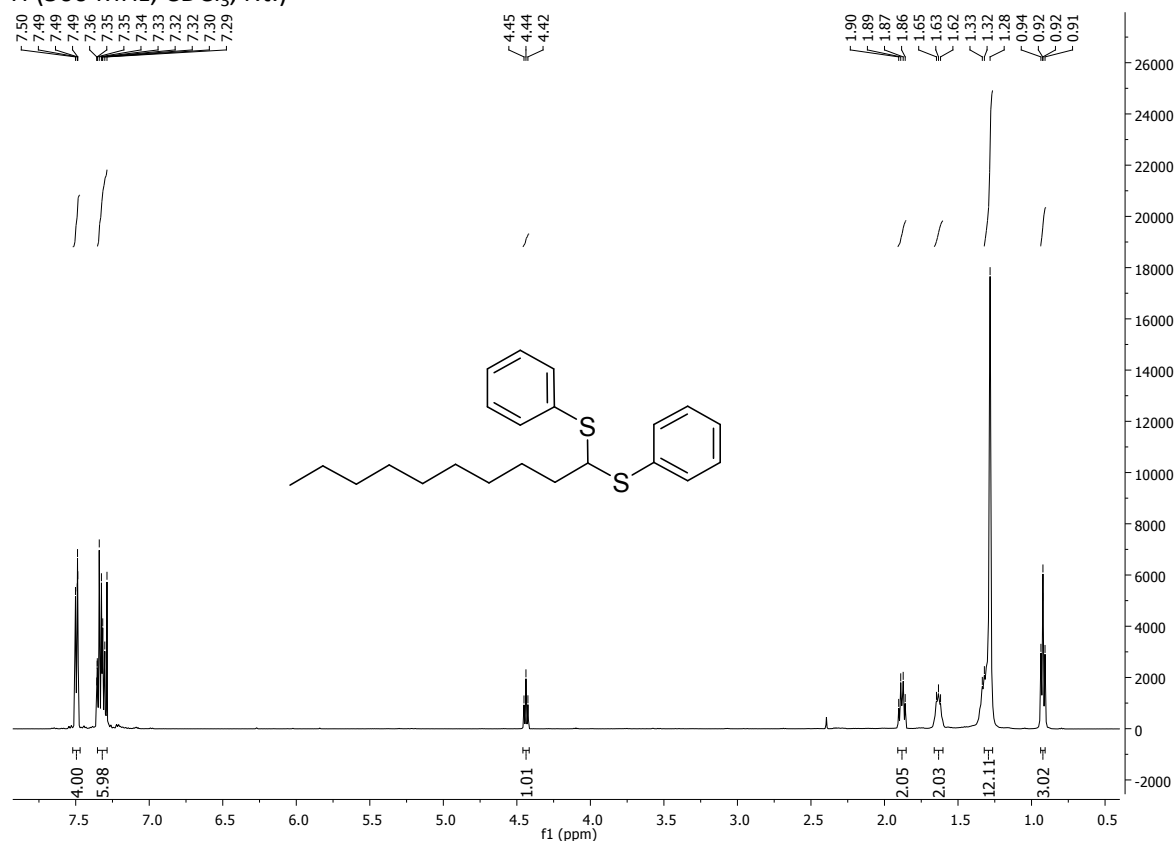

$^{13}\text{C}$  (125 MHz,  $\text{CDCl}_3$ , r.t.)

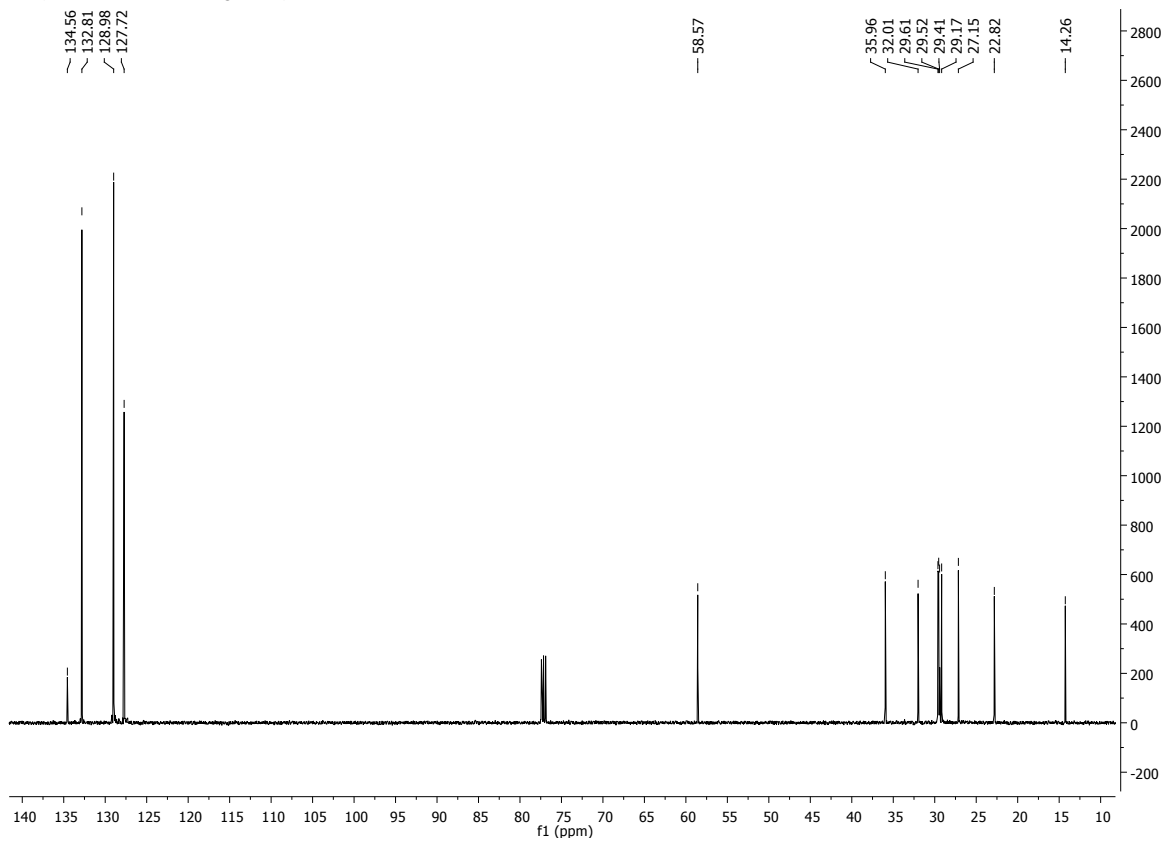

**3f**

$^1\text{H}$  (500 MHz,  $\text{CDCl}_3$ , r.t.)

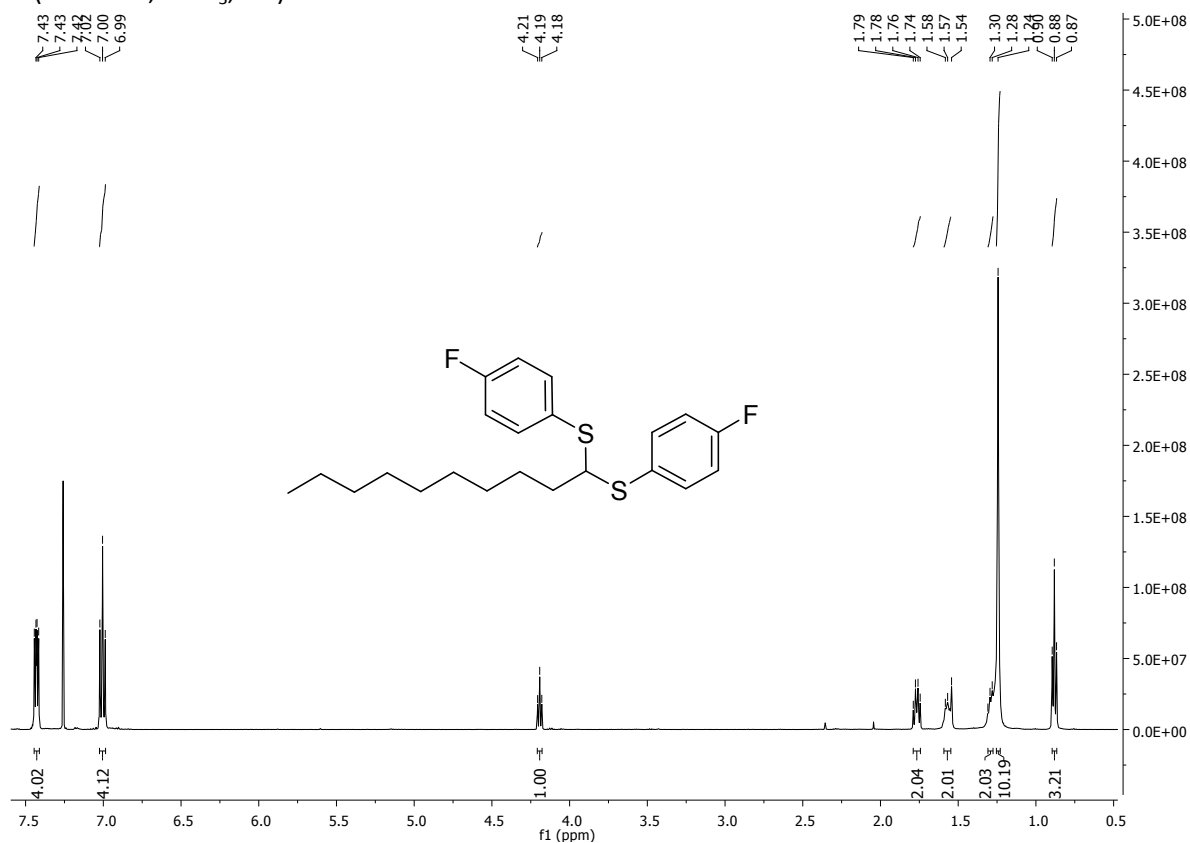

$^{13}\text{C}$  (125 MHz,  $\text{CDCl}_3$ , r.t.)

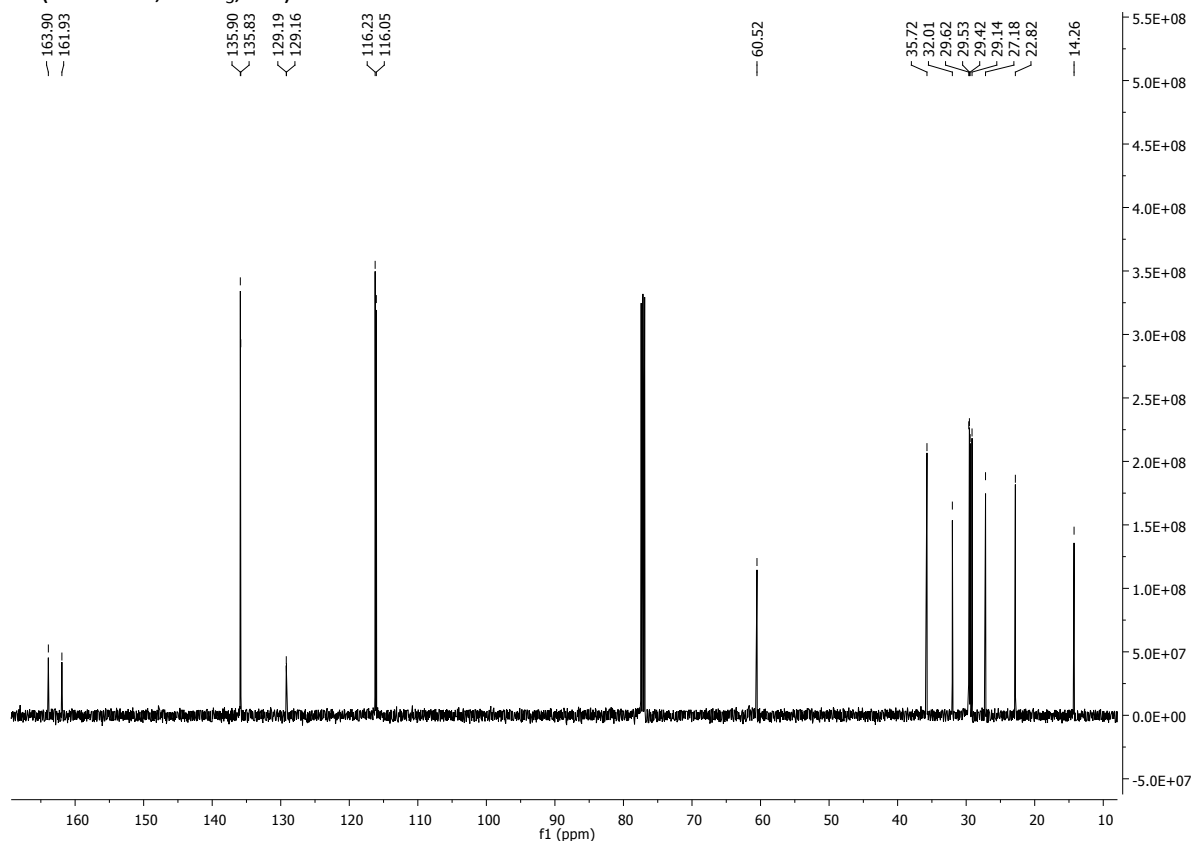

$^{19}\text{F}$  (235 MHz,  $\text{CDCl}_3$ , r.t.)

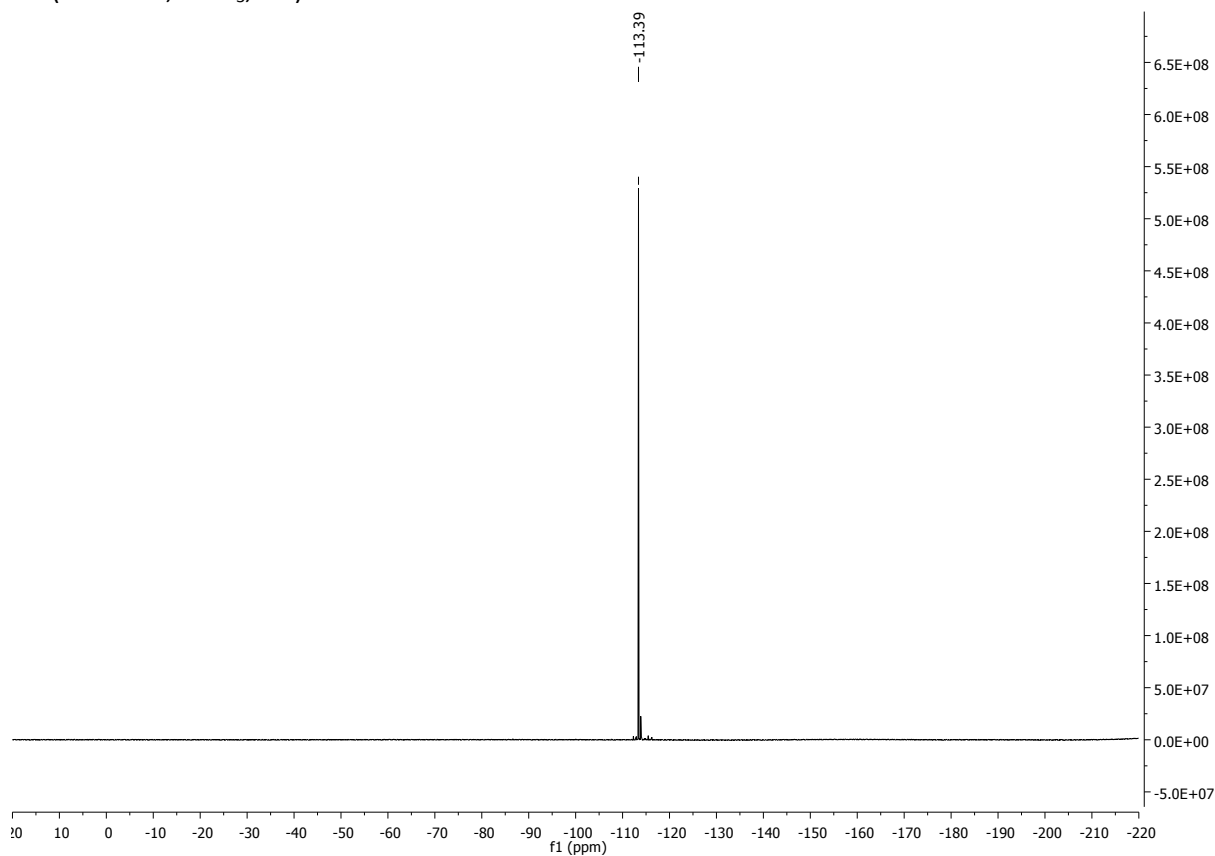

**3g**

$^1\text{H}$  (500 MHz,  $\text{CDCl}_3$ , r.t.)

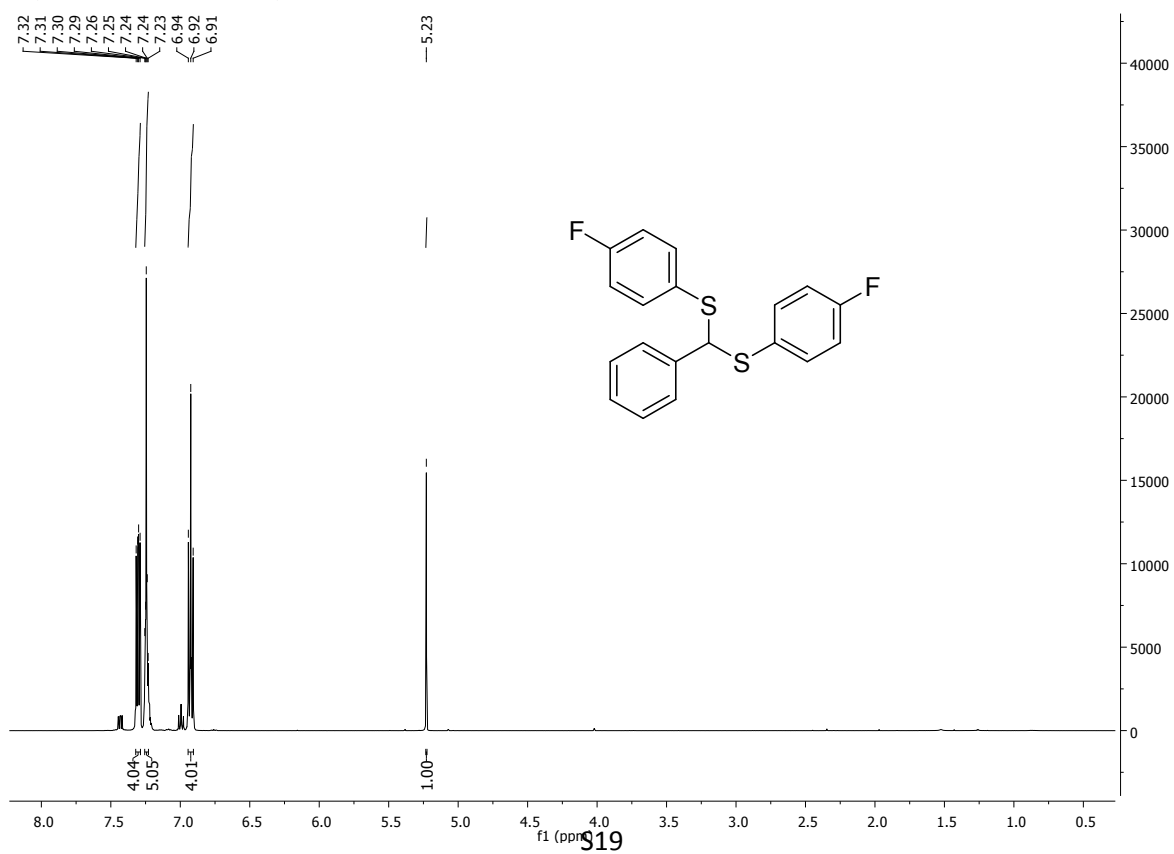

$^{13}\text{C}$  (125 MHz,  $\text{CDCl}_3$ , r.t.)

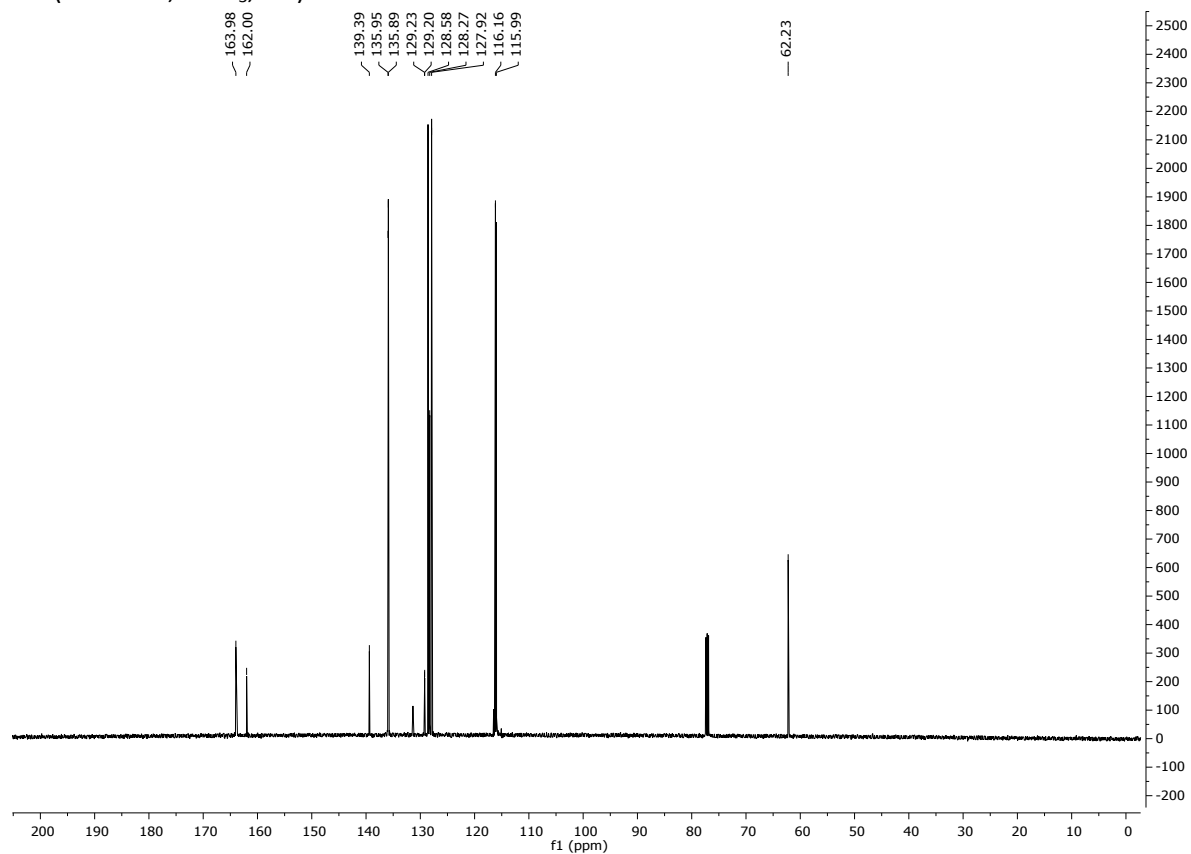

$^{19}\text{F}$  (470 MHz,  $\text{CDCl}_3$ , r.t.)

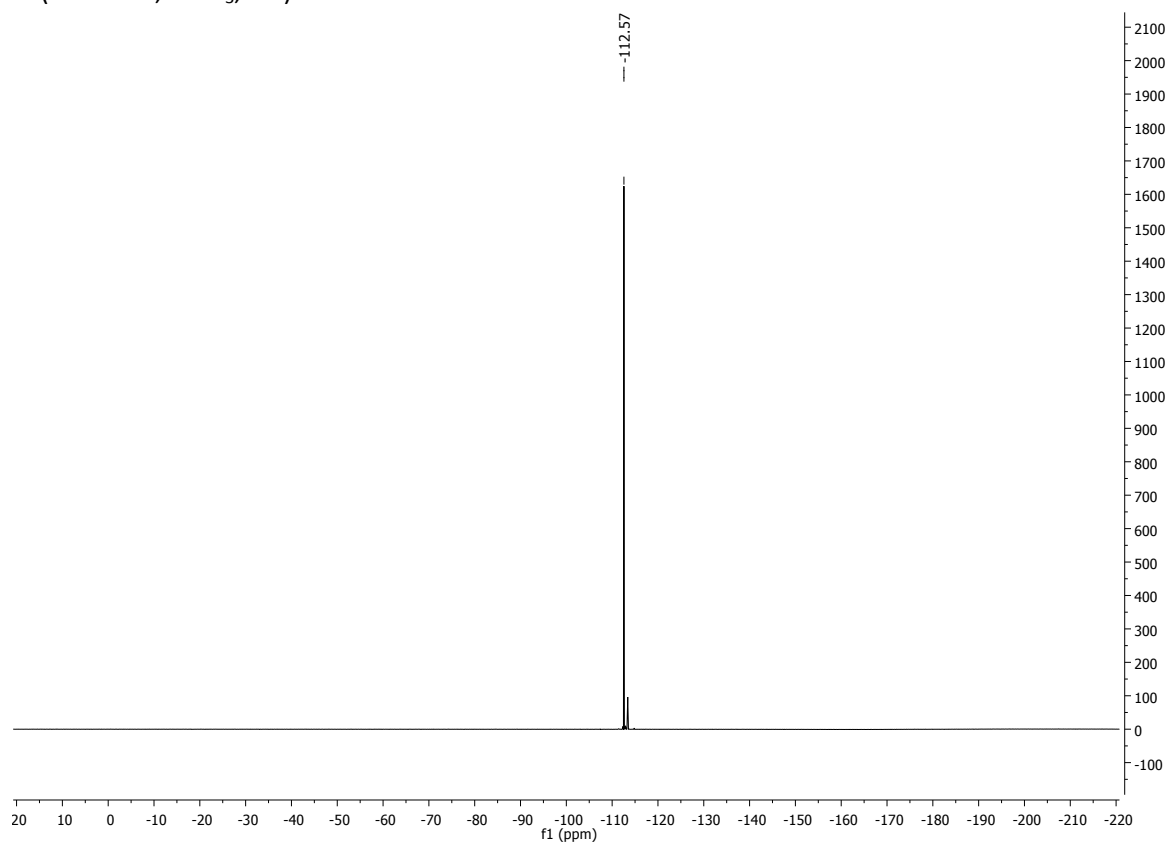

**5bb**

<sup>1</sup>H (500 MHz, CDCl<sub>3</sub>, r.t.)

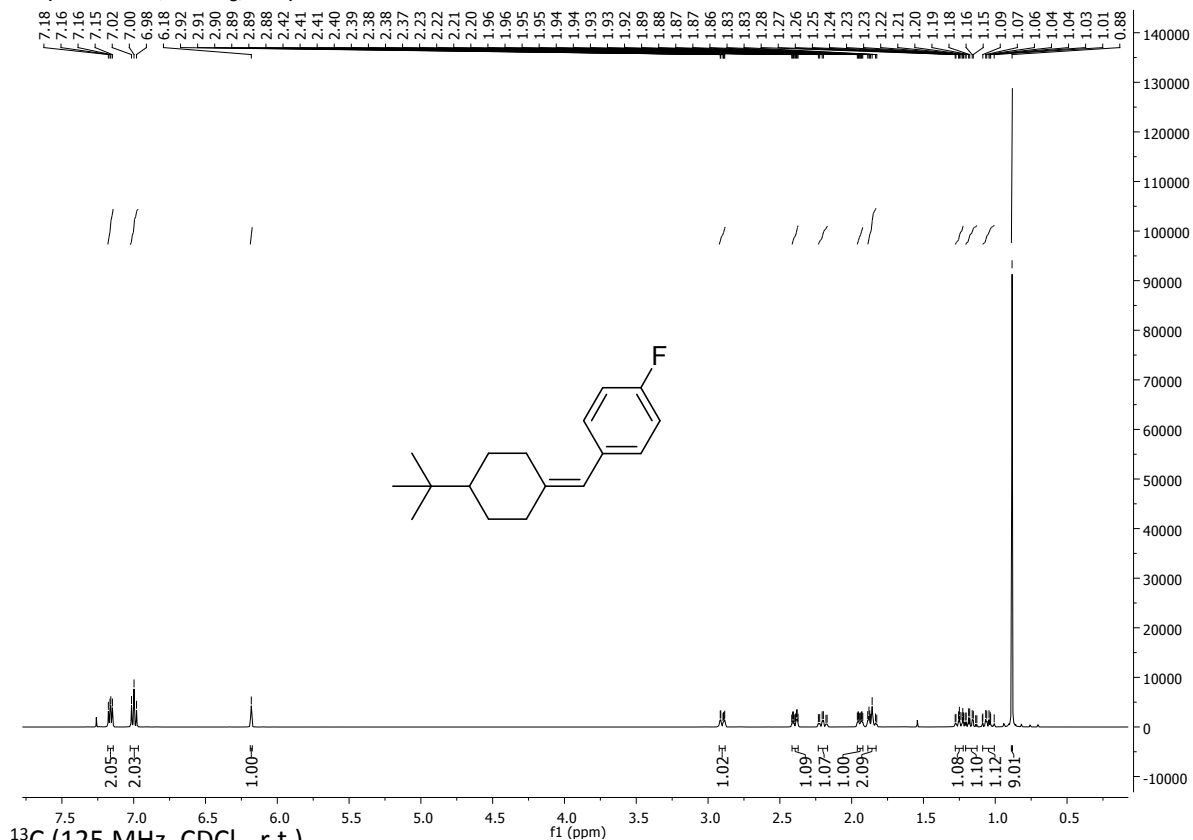

<sup>13</sup>C (125 MHz, CDCl<sub>3</sub>, r.t.)

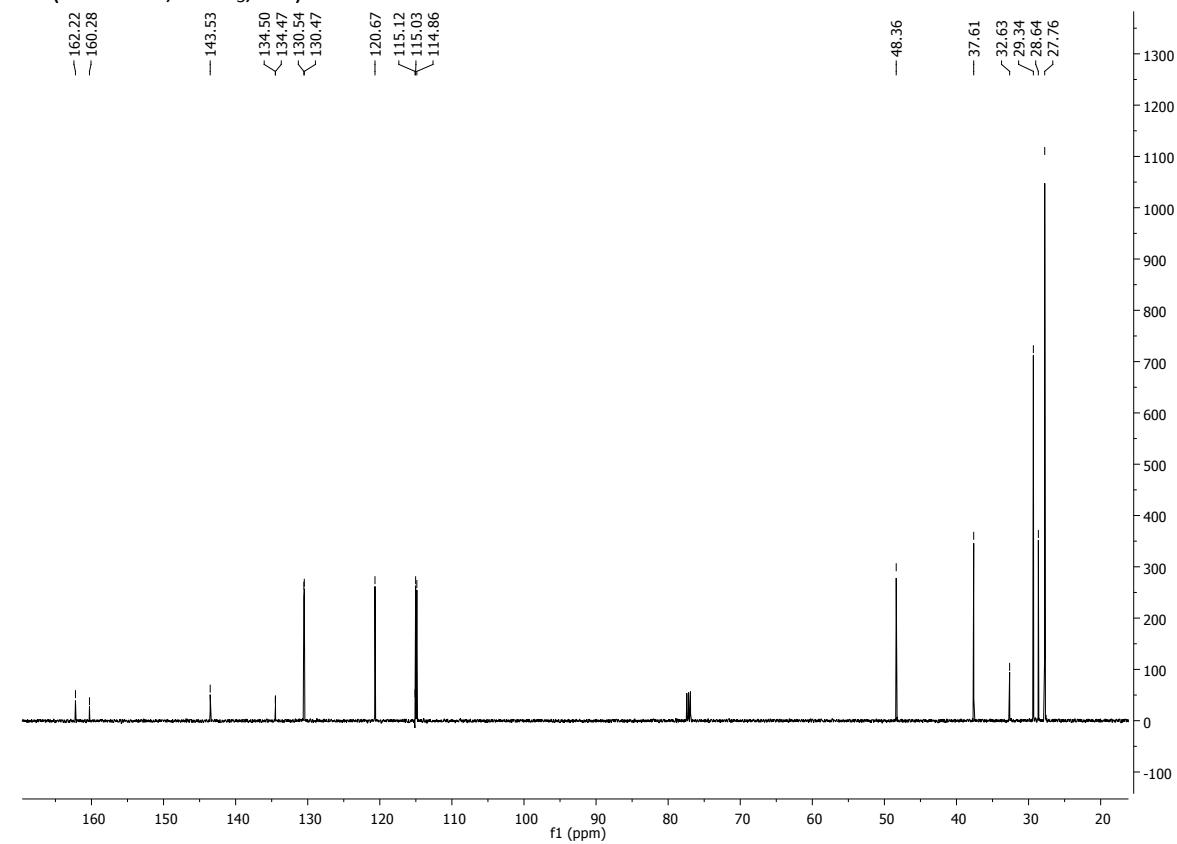

$^{19}\text{F}$  (470 MHz,  $\text{CDCl}_3$ , r.t.)

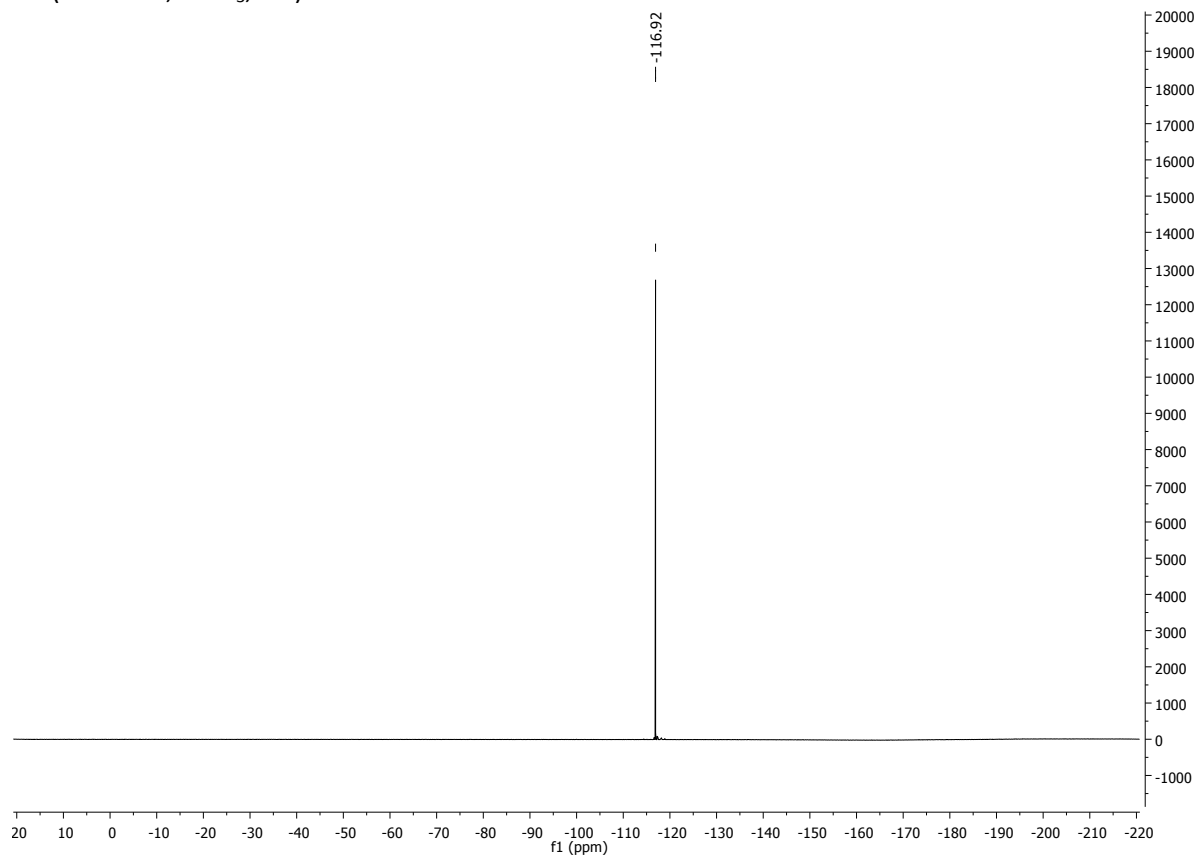

**5bc**

$^1\text{H}$  (500 MHz,  $\text{CDCl}_3$ , r.t.)

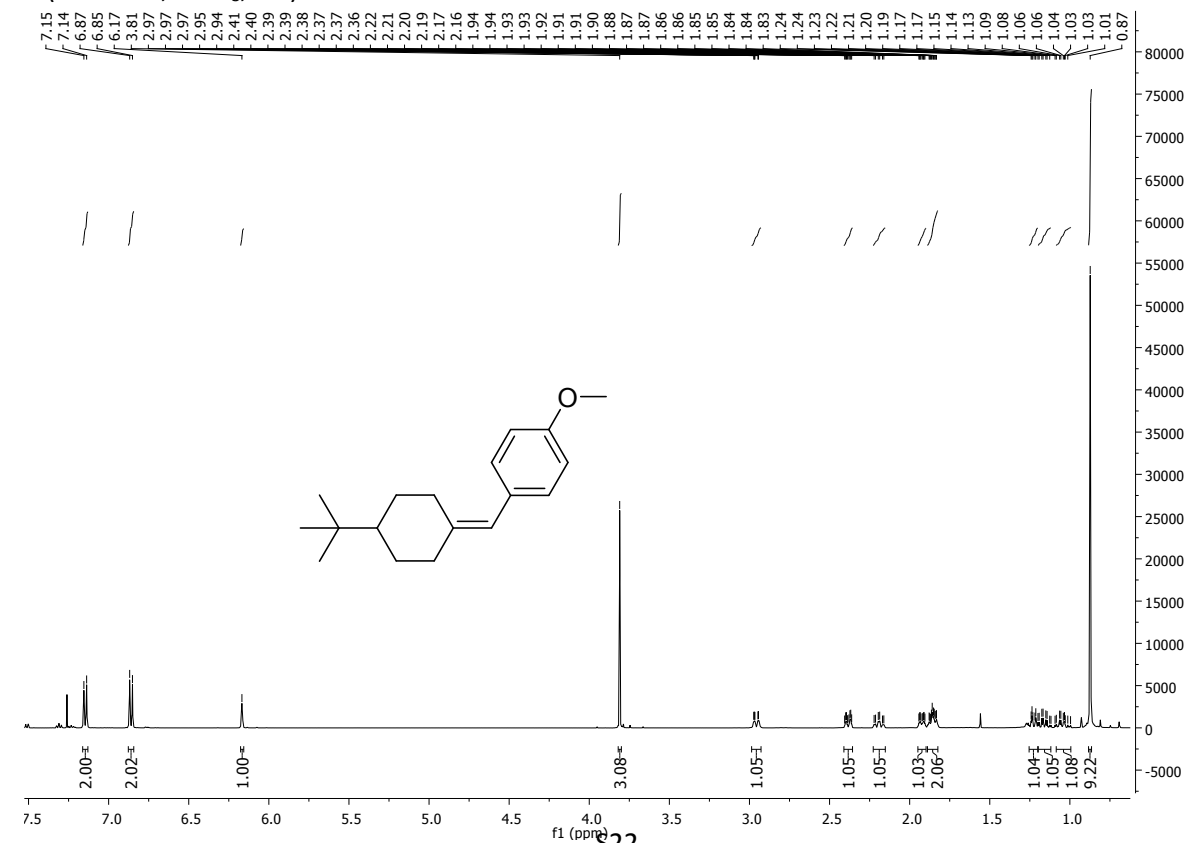

<sup>13</sup>C (125 MHz, CDCl<sub>3</sub>, r.t.)

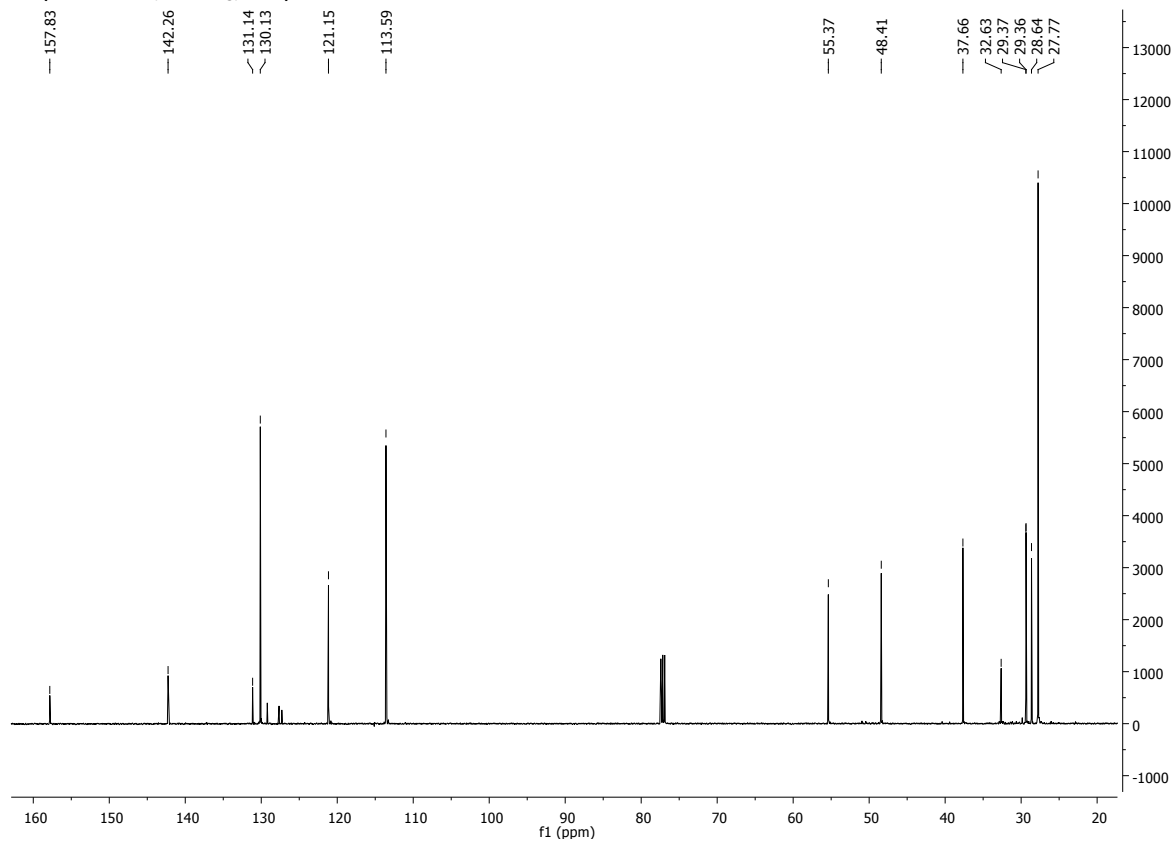

5d

<sup>1</sup>H (500 MHz, CDCl<sub>3</sub>, r.t.)

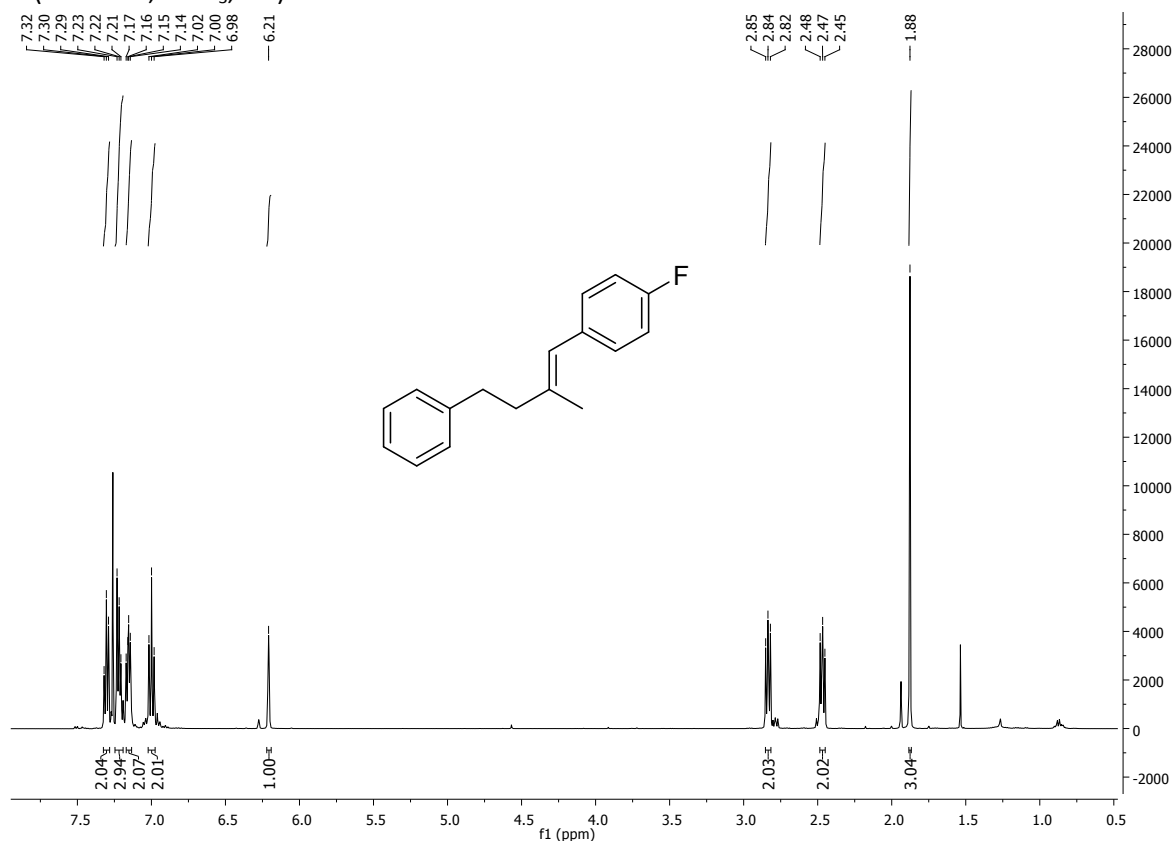

S23

<sup>13</sup>C (125 MHz, CDCl<sub>3</sub>, r.t.)

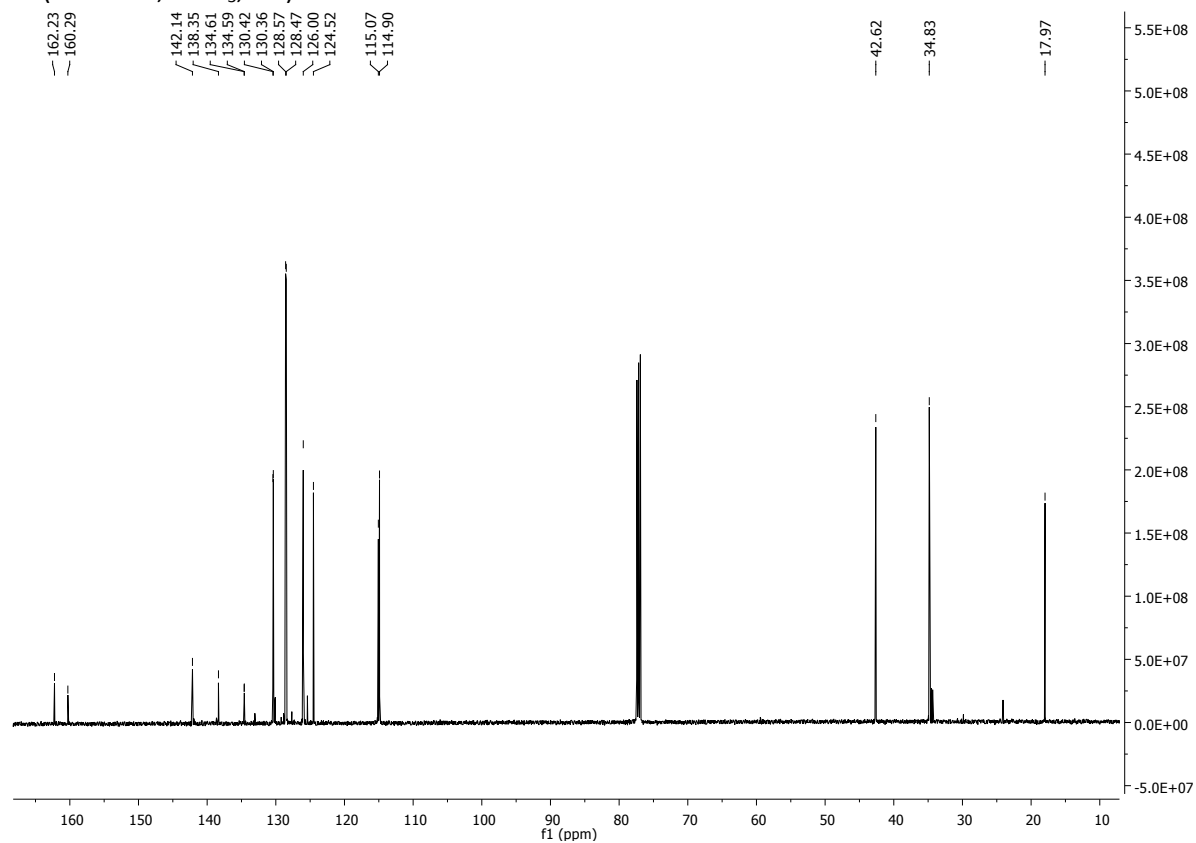

<sup>19</sup>F (470 MHz, CDCl<sub>3</sub>, r.t.)

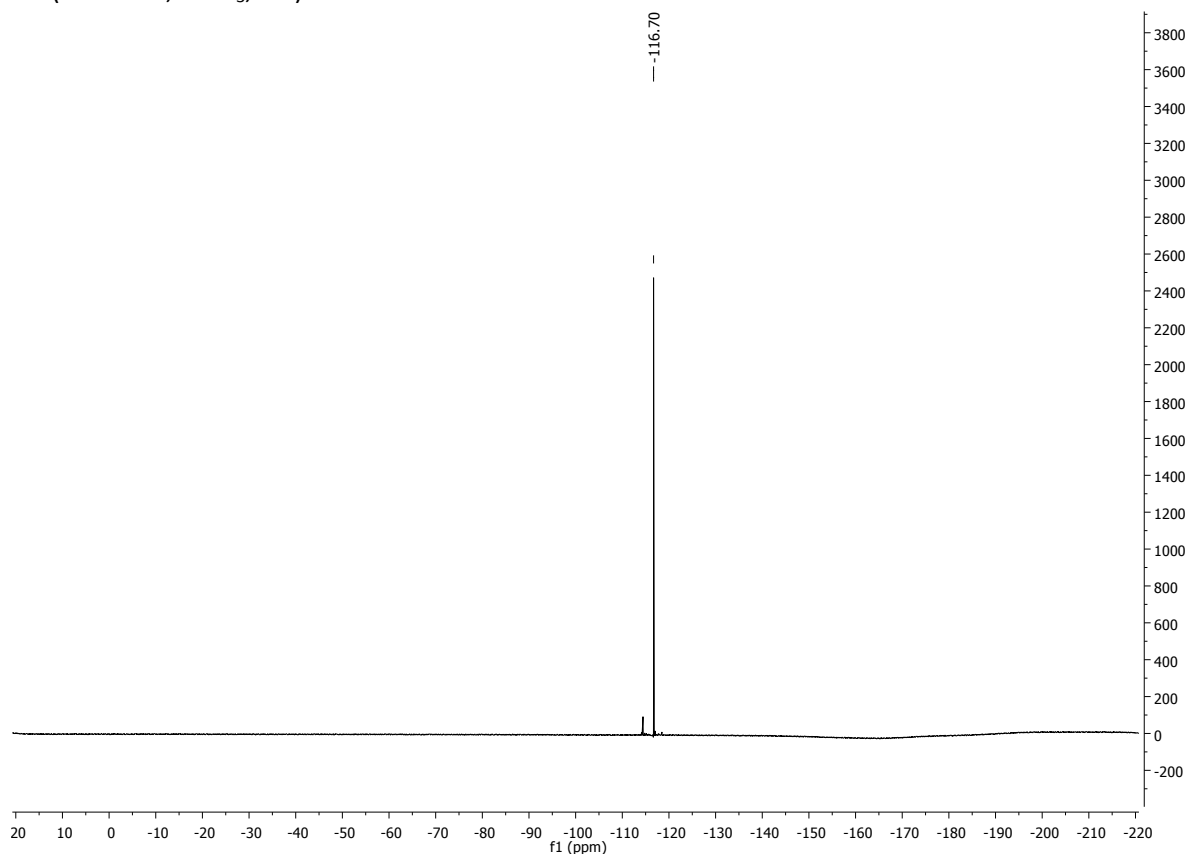



5e

$^1\text{H}$  (500 MHz,  $\text{CDCl}_3$ , r.t.)

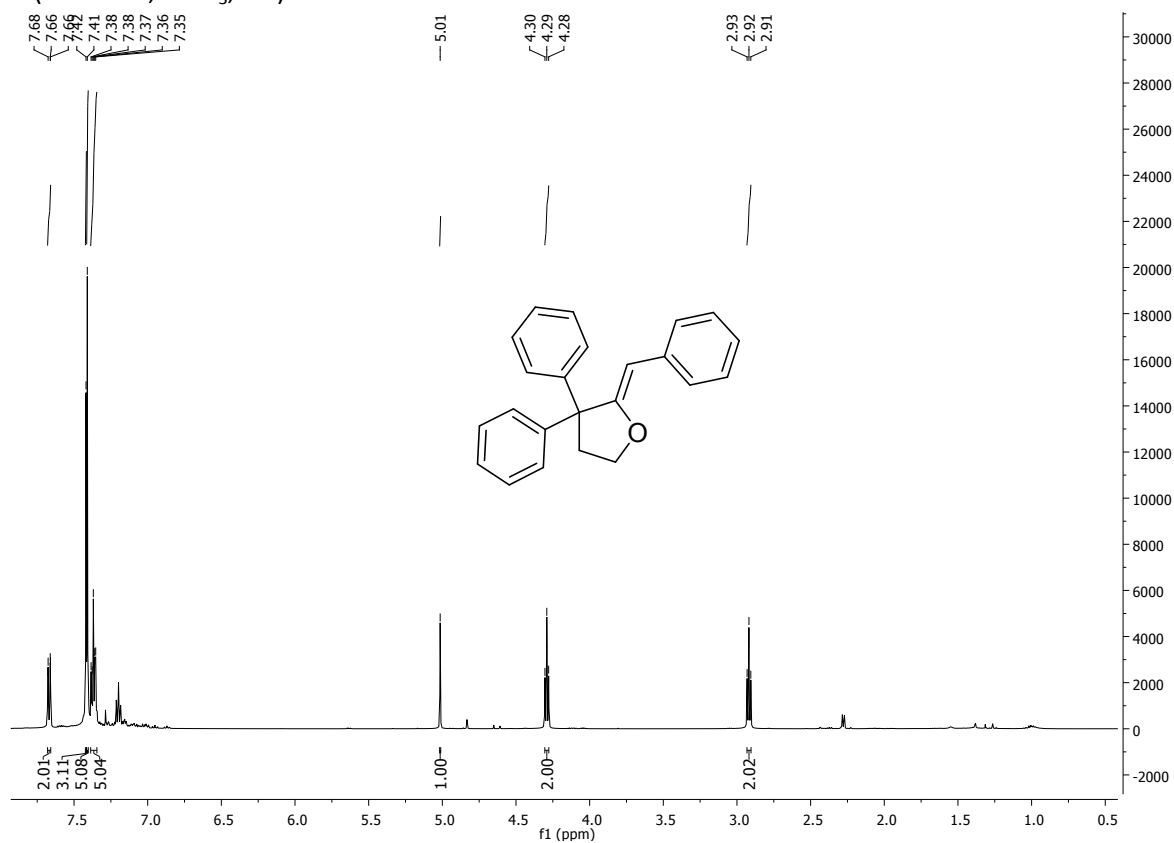

$^{13}\text{C}$  (125 MHz,  $\text{CDCl}_3$ , r.t.)

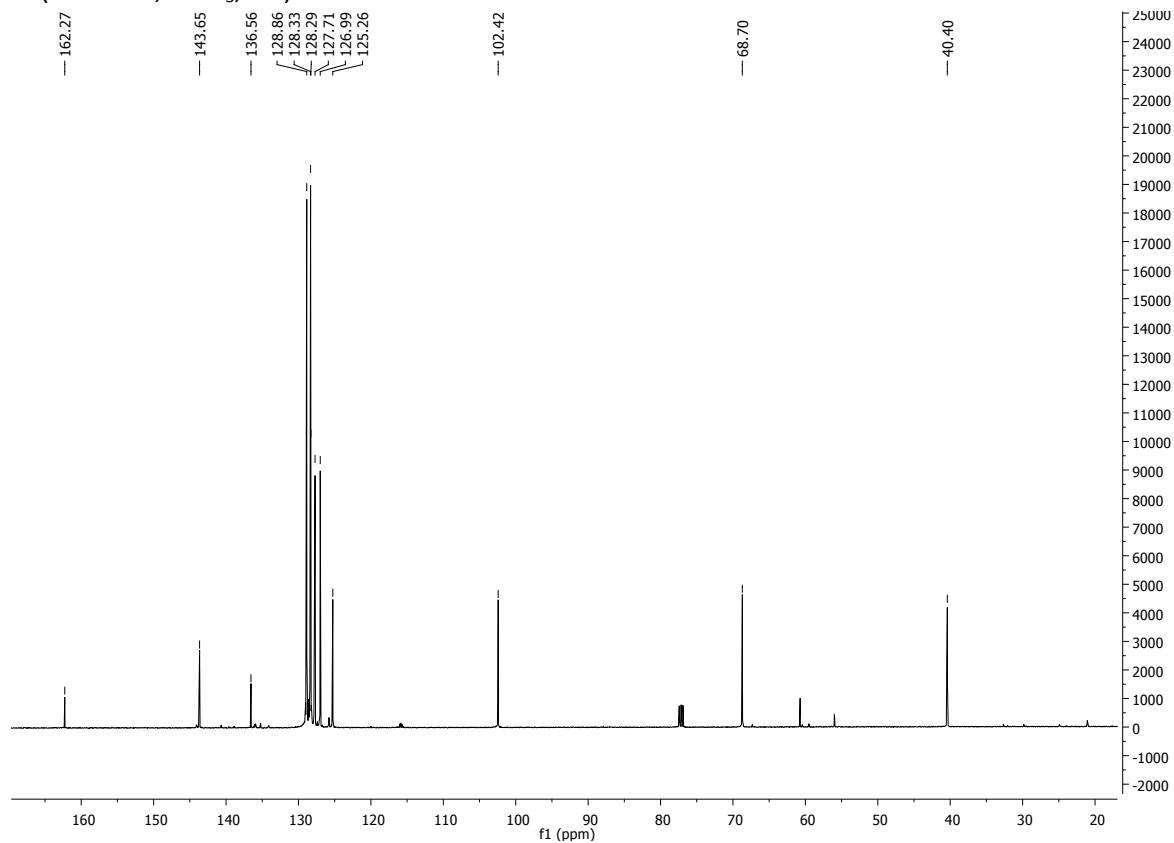

5g

$^1\text{H}$  (500 MHz,  $\text{CDCl}_3$ , r.t.)

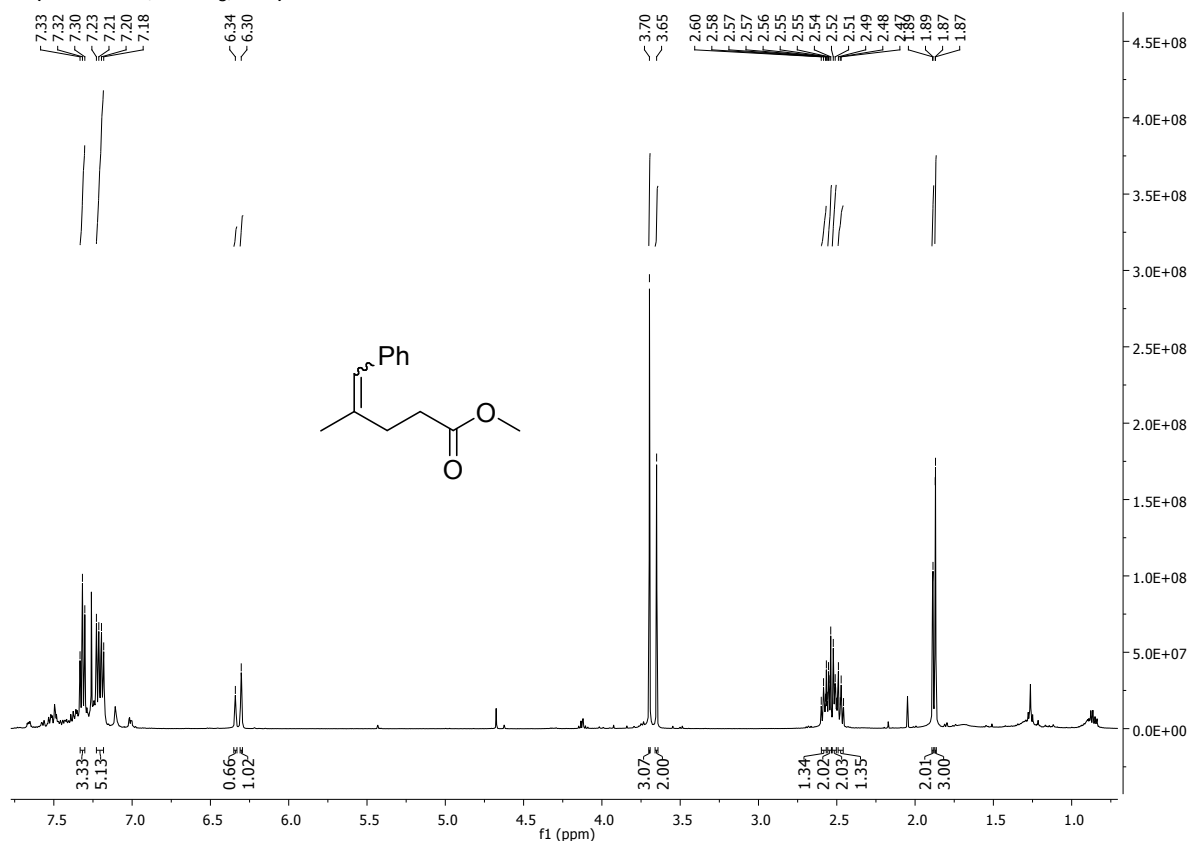

$^{13}\text{C}$  (125 MHz,  $\text{CDCl}_3$ , r.t.)

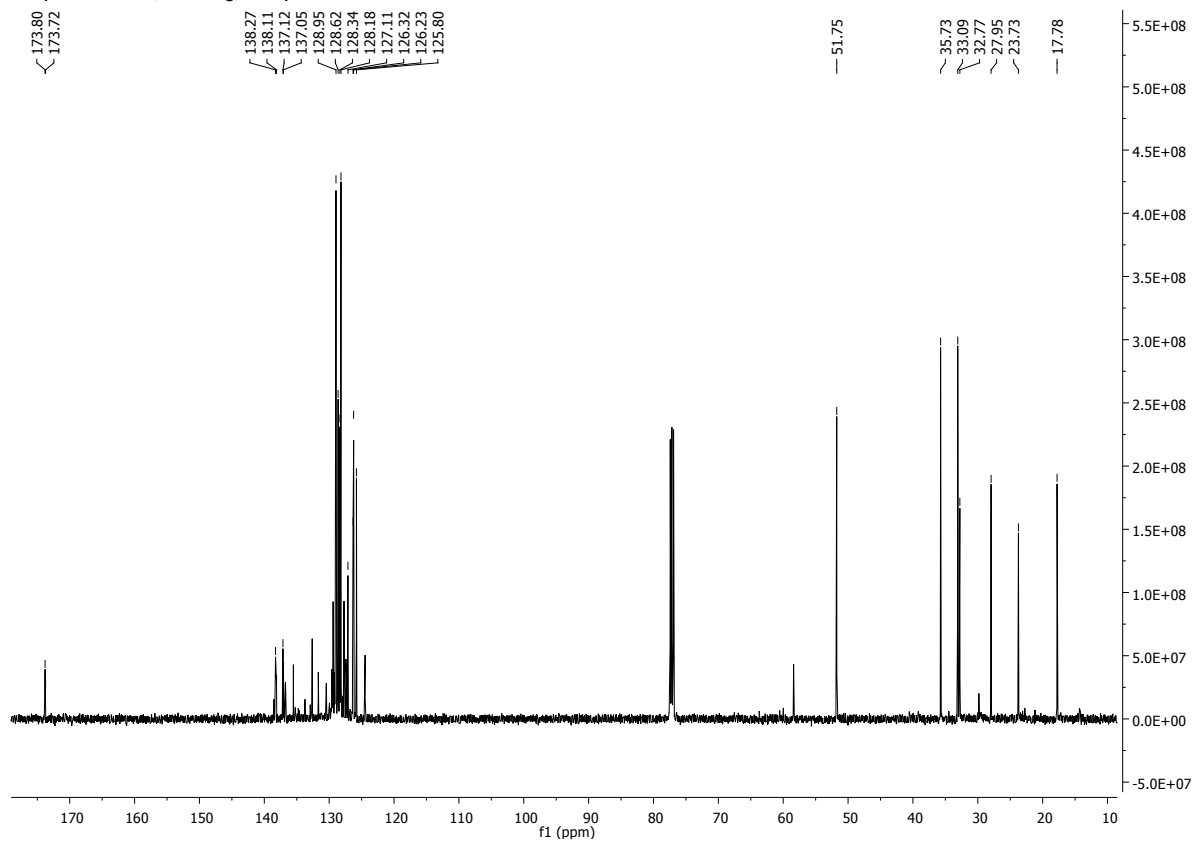

5j

$^1\text{H}$  (500 MHz,  $\text{C}_6\text{D}_6$ , r.t.)

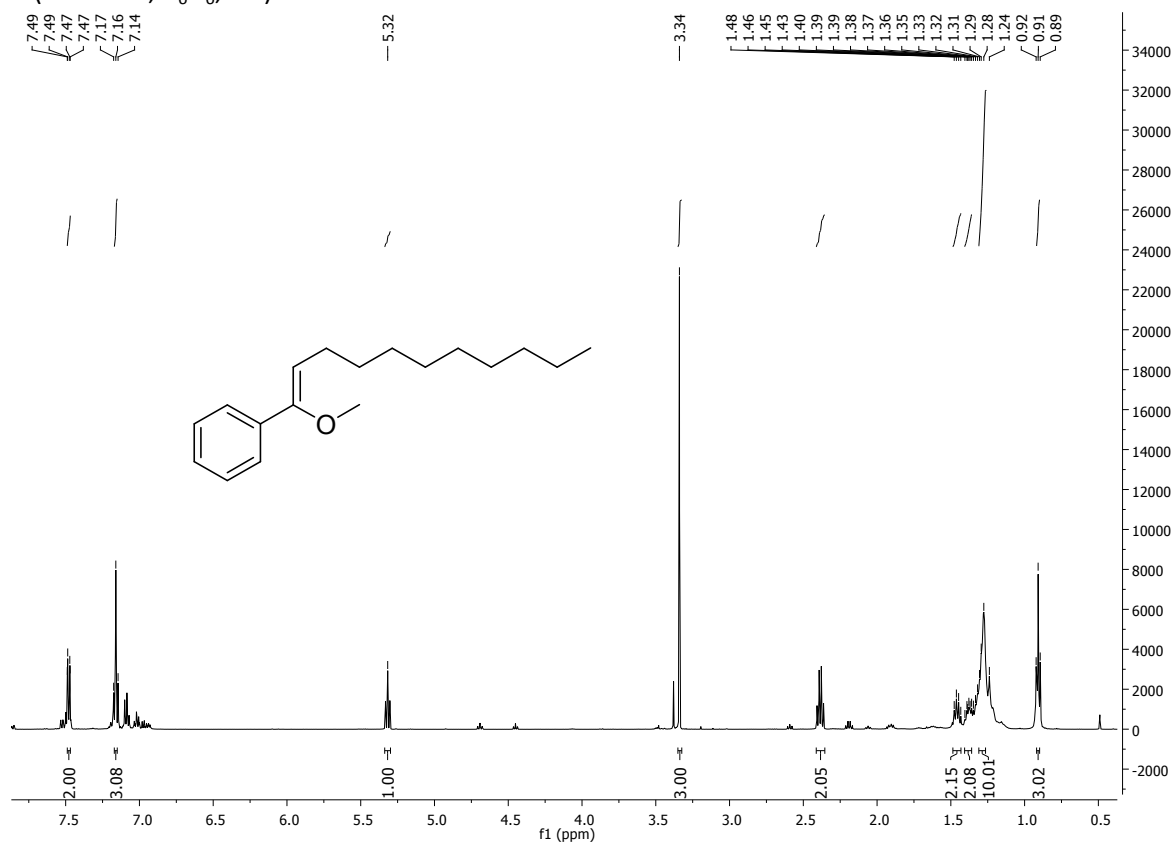

$^{13}\text{C}$  (125 MHz,  $\text{C}_6\text{D}_6$ , r.t.)

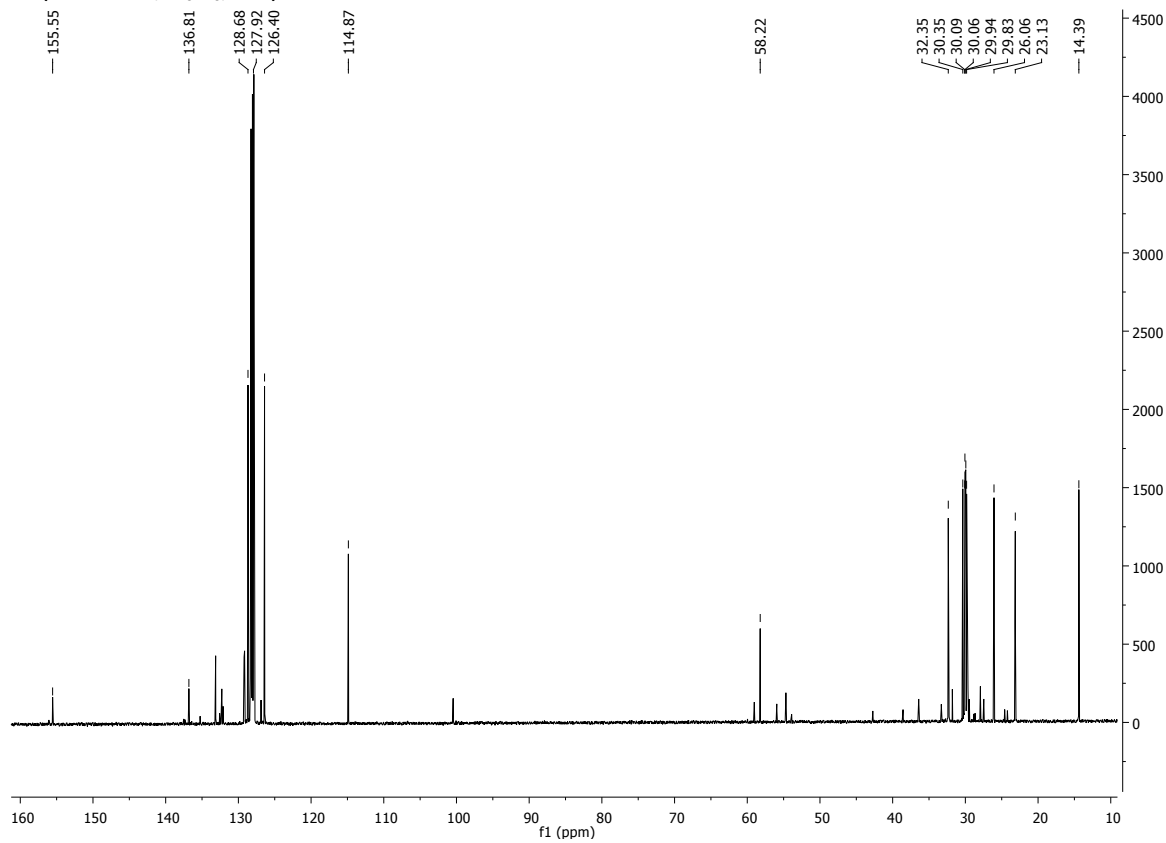

Supplement: c4dt03979c1.pdf [file c4dt03979c1.pdf]
